# Supplementary material for: A mine sweeping game to predict large-scale earthquakes
Source: Research Square preprint supplement (doi:10.21203/rs.3.rs-2852660/v1), 2023-05-12
Supplement: Supplementary file 1 [file e569980c8b35a0a7845ed663.docx]

**Supplementary Materials**

**Methods**

**Data acquisition**

Global earthquakes with *M* ≥ 8.0 over the past 100 years (and some earthquakes with *M* of 6.6-7.9 that have caused significant casualties worldwide), as well as triggering earthquakes with *M* ≥ 4.0 within 3000 km and 300 days around them have been summarized (Extended Data Table 1). The *M*8.1 Chile earthquake on May 21, 1960 is an adjacent precursor to the *M*9.5 earthquake on May 23. The *M*8.0 Papua New Guinea earthquake on Jul. 14, 1971 is an adjacent precursor to the *M*8.1 earthquake on Jul. 26. The *M*8.6 Sumatra (Indonesia) earthquake on Mar. 29, 2005 is an aftershock of the *M*9.1 earthquake on Dec. 26, 2004. They are not the triggered earthquakes and therefore were excluded in this study. Information about these earthquakes was acquired from the U. S. Geological Survey (USGS) Web page (http://earthquake.usgs.gov/earthquakes). The distance from the triggering epicenter to the triggered epicenter was calculated using the GPScalc(sh3) V1.2 software28.

**Data refinement**

The data have been refined as follows. If a secondary earthquake with a smaller magnitude (but an earthquake with a reduction of more than one magnitude should be ignored) occurs within a radius of 50 km after the occurrence of the first earthquake, the first earthquake will be ruled out. If a secondary earthquake with a larger magnitude occurs within a radius of 50 km after the occurrence of the first earthquake, the former earthquake will be excluded and the latter one will be included. To obtain better regression equations, the data with too low distances (<300 km for *M* ≥ 6.0) or too low time intervals (<50 d for *M* ≥ 5.7) were ruled out [marked with "(L)" and the strikeout in table S1].

**Correlation and** **statistical analysis**

The correlations between the magnitude and distance (TGE to TDE) and between the magnitude and time interval (TGE to TDE) were calculated. The F-test was performed to analyze all of the correlations and to determine whether the data pairs fit the regression model (linear, quadratic, logarithmic, and exponential regressions were tested). The regression equation, the correlation coefficient, and the P-value were obtained by using SPSS v19.0 and Microsoft Excel 2013. The P-value threshold and R2 threshold for the statistical significance for claims of correlations were 0.05 and 0.5, respectively.

**Supplementary References**

28. Elmeligy Abdelhamid, S. H., Kuhlman, C. J., Marathe, M. V., Mortveit, H. S. & Ravi, S. S. GDSCalc: a web-based application for evaluating discrete graph dynamical systems. *PLoS One* **10**, e0133660 (2015).

**Extended Data Table 1 | Association between triggering earthquakes and corresponding triggered earthquakes.**

| Triggering earthquake | | | Triggered earthquake | | | Distance (km) | Time interval (d) |
| --- | --- | --- | --- | --- | --- | --- | --- |
| Time | *M* | Location | Time | *M* | Location |
| 1994/7/22 | 7.3 | 42.340°N 132.865°E | 1994/10/4 | 8.3 | 43.773°N 147.321°E (Shikotan, Russia) | 1212 | 74 |
| 1994/4/5 | 6.2 | 51.296°N 178.152°W | 1994/10/4 | 8.3 | 43.773°N 147.321°E | 2753 | 182 |
| ~~1994/8/31~~ | ~~6.2~~ | ~~43.719°N 146.013°E~~ | ~~1994/10/4~~ | ~~8.3~~ | ~~43.773°N 147.321°E~~ | ~~108 (L)~~ | ~~34 (L)~~ |
| ~~1994/8/20~~ | ~~6.2~~ | ~~44.656°N 149.176°E~~ | ~~1994/10/4~~ | ~~8.3~~ | ~~43.773°N 147.321°E~~ | ~~184 (L)~~ | ~~45 (L)~~ |
| ~~1958/10/29~~ | ~~6.6~~ | ~~51.353°N 179.357°E~~ | ~~1958/11/7~~ | ~~8.3~~ | ~~44.479°N 148.485°E~~ | ~~2509~~ | ~~9 (L)~~ |
| 1958/2/22 | 6.3 | 50.190°N 175.472°W | 1958/11/7 | 8.3 | 44.479°N 148.485°E (Kuril’sk, Russia) | 2710 | 258 |
| 1958/7/23 | 6.3 | 31.445°N 142.590°E | 1958/11/7 | 8.3 | 44.479°N 148.485°E | 1630 | 107 |
| 1958/6/19 | 6.2 | 49.818°N 155.878°E | 1958/11/7 | 8.3 | 44.479°N 148.485°E | 850 | 141 |
| 1958/2/2 | 6.1 | 48.166°N 154.442°E | 1958/11/7 | 8.3 | 44.479°N 148.485°E | 628 | 278 |
| 1958/9/3 | 6.1 | 40.643°N 143.138°E | 1958/11/7 | 8.3 | 44.479°N 148.485°E | 636 | 65 |
| ~~1958/4/23~~ | ~~6.0~~ | ~~45.313°N 151.749°E~~ | ~~1958/11/7~~ | ~~8.3~~ | ~~44.479°N 148.485°E~~ | ~~280 (L)~~ | ~~198~~ |
| 1958/3/4 | 6.0 | 55.419°N 166.449°E | 1958/11/7 | 8.3 | 44.479°N 148.485°E | 1810 | 248 |
| ~~1958/2/15~~ | ~~6.0~~ | ~~43.876°N 147.393°E~~ | ~~1958/11/7~~ | ~~8.3~~ | ~~44.479°N 148.485°E~~ | ~~114 (L)~~ | ~~265~~ |
| 1963/3/16 | 7.7 | 46.636°N 154.783°E | 1963/10/13 | 8.5 | 44.872°N 149.483°E (Kuril’sk, Russia) | 474 | 211 |
| 1963/5/22 | 6.9 | 48.622°N 154.660°E | 1963/10/13 | 8.5 | 44.872°N 149.483°E | 592 | 144 |
| 1963/8/15 | 6.5 | 37.721°N 141.883°E | 1963/10/13 | 8.5 | 44.872°N 149.483°E | 1045 | 59 |
| 1963/3/27 | 6.3 | 35.789°N 135.810°E | 1963/10/13 | 8.5 | 44.872°N 149.483°E | 1634 | 200 |
| 1963/4/30 | 6.1 | 51.310°N 178.725°E | 1963/10/13 | 8.5 | 44.872°N 149.483°E | 2255 | 166 |
| ~~1963/3/31~~ | ~~6.1~~ | ~~44.184°N 148.024°E~~ | ~~1963/10/13~~ | ~~8.5~~ | ~~44.872°N 149.483°E~~ | ~~147 (L)~~ | ~~196~~ |
| 2006/8/25 | 6.5 | 51.148°N 157.522°E | 2006/11/15 | 8.3 | 46.592°N 153.266°E (Kuril’sk, Russia) | 622 | 82 |
| 2006/6/27 | 6.2 | 52.230°N 176.158°E | 2006/11/15 | 8.3 | 46.592°N 153.266°E | 1821 | 141 |
| 2006/5/22 | 6.2 | 54.271°N 158.447°E | 2006/11/15 | 8.3 | 46.592°N 153.266°E | 979 | 177 |
| 2006/8/20 | 6.0 | 49.823°N 156.415°E | 2006/11/15 | 8.3 | 46.592°N 153.266°E | 443 | 87 |
| 2013/2/2 | 6.9 | 42.770°N 143.092°E | 2013/5/24 | 8.3 | 54.892°N 153.221°E (Sea of Okhotsk) | 1625 | 111 |
| 2012/11/17 | 6.5 | 49.280°N 155.425°E | 2013/5/24 | 8.3 | 54.892°N 153.221°E | 665 | 188 |
| 2012/12/15 | 6.0 | 52.291°N 174.011°E | 2013/5/24 | 8.3 | 54.892°N 153.221°E | 1395 | 160 |
| ~~2013/5/18~~ | ~~6.0~~ | ~~37.739°N 141.471°E~~ | ~~2013/5/24~~ | ~~8.3~~ | ~~54.892°N 153.221°E~~ | ~~2138~~ | ~~6 (L)~~ |
| 1952/3/7 | 6.5 | 36.458°N 136.242°E | 1952/11/5 | 9.0 | 52.623°N 159.779°E (Kamchatka, Russia) | 2626 | 243 |
| 1952/7/25 | 6.2 | 42.800°N 145.051°E | 1952/11/5 | 9.0 | 52.623°N 159.779°E | 1664 | 103 |
| ~~1952/9/28~~ | ~~6.2~~ | ~~50.756°N 157.063°E~~ | ~~1952/11/5~~ | ~~9.0~~ | ~~52.623°N 159.779°E~~ | ~~278 (L)~~ | ~~38 (L)~~ |
| 1952/5/8 | 6.0 | 35.398°N 140.249°E | 1952/11/5 | 9.0 | 52.623°N 159.779°E | 2588 | 181 |
| ~~1922/8/16~~ | ~~6.7~~ | ~~52.981°N 159.741°E~~ | ~~1923/2/4~~ | ~~8.4~~ | ~~54.486°N 160.472°E~~ | ~~177 (L)~~ | ~~172~~ |
| ~~1923/2/2~~ | ~~6.7~~ | ~~52.261°N 161.885°E~~ | ~~1923/2/4~~ | ~~8.4~~ | ~~54.486°N 160.472°E~~ | ~~263 (L)~~ | ~~2 (L)~~ |
| 1922/8/11 | 6.1 | 55.647°N 167.039°E | 1923/2/4 | 8.4 | 54.486°N 160.472°E (Mil’kovo, Russia) | 451 | 177 |
| 1922/12/9 | 6.7 | 41.225°N 141.749°E | 1923/2/4 | 8.4 | 54.486°N 160.472°E | 2037 | 57 |
| 1964/9/16 | 6.1 | 60.003°N 147.093°W | 1965/2/4 | 8.7 | 51.251°N 178.715°E (Alaska, USA) | 2364 | 141 |
| 1964/9/23 | 6.0 | 53.734°N 163.840°W | 1965/2/4 | 8.7 | 51.251°N 178.715°E | 1181 | 134 |
| ~~1957/2/21~~ | ~~6.9~~ | ~~52.925°N 171.345°W~~ | ~~1957/3/9~~ | ~~8.6~~ | ~~51.499°N 175.626°W~~ | ~~337~~ | ~~16 (L)~~ |
| ~~1956/12/9~~ | ~~6.5~~ | ~~51.232°N 179.089°W~~ | ~~1957/3/9~~ | ~~8.6~~ | ~~51.499°N 175.626°W~~ | ~~245 (L)~~ | ~~90~~ |
| 1956/10/20 | 6.5 | 52.123°N 177.571°E | 1957/3/9 | 8.6 | 51.499°N 175.626°W (Alaska, USA) | 488 | 140 |
| 1956/11/29 | 6.3 | 49.255°N 155.315°E | 1957/3/9 | 8.6 | 51.499°N 175.626°W | 2010 | 100 |
| 1956/9/21 | 6.2 | 51.512°N 159.432°E | 1957/3/9 | 8.6 | 51.499°N 175.626°W | 1717 | 169 |
| 1985/11/1 | 6.2 | 53.249°N 166.936°W | 1986/5/8 | 8.0 | 51.520°N 174.776°W (Alaska, USA) | 576 | 188 |
| ~~1985/10/25~~ | ~~6.0~~ | ~~52.072°N 171.350°W~~ | ~~1986/5/8~~ | ~~8.0~~ | ~~51.520°N 174.776°W~~ | ~~244 (L)~~ | ~~195~~ |
| ~~1986/4/12~~ | ~~6.0~~ | ~~54.164°N 167.883°W~~ | ~~1986/5/8~~ | ~~8.0~~ | ~~51.520°N 174.776°W~~ | ~~537~~ | ~~26 (L)~~ |
| 1945/10/25 | 6.5 | 56.903°N 163.889°E | 1946/4/1 | 8.6 | 53.492°N 162.832°W (Alaska, USA) | 2322 | 158 |
| 1946/1/13 | 6.5 | 59.322°N 148.750°W | 1946/4/1 | 8.6 | 53.492°N 162.832°W | 1107 | 78 |
| 1945/11/4 | 6.2 | 59.393°N 150.577°W | 1946/4/1 | 8.6 | 53.492°N 162.832°W | 1018 | 148 |
| 1945/12/25 | 6.2 | 52.405°N 174.880°E | 1946/4/1 | 8.6 | 53.492°N 162.832°W | 1505 | 97 |
| 1945/11/27 | 6.0 | 55.176°N 166.245°E | 1946/4/1 | 8.6 | 53.492°N 162.832°W | 2047 | 125 |
| 1938/3/22 | 6.7 | 52.266°N 132.783°W | 1938/11/11 | 8.2 | 55.178°N 158.181°W (Alaska, USA) | 1702 | 234 |
| 1938/5/28 | 6.2 | 42.659°N 126.313°W | 1938/11/11 | 8.2 | 55.178°N 158.181°W | 2772 | 167 |
| 1938/7/24 | 6.1 | 53.389°N 166.778°W | 1938/11/11 | 8.2 | 55.178°N 158.181°W | 614 | 110 |
| 2021/5/31 | 6.1 | 62.449°N 148.251°W | 2021/7/29 | 8.2 | 55.364°N 157.888°W (Alaska, USA) | 1013 | 59 |
| 2021/1/3 | 6.1 | 51.220°N 179.793°W | 2021/7/29 | 8.2 | 55.364°N 157.888°W | 1477 | 207 |
| 1963/6/24 | 6.4 | 59.499°N 152.280°W | 1964/3/28 | 9.2 | 60.908°N 147.339°W (Alaska, USA) | 322 | 278 |
| 1964/1/12 | 5.9 | 53.299°N 166.388°W | 1964/3/28 | 9.2 | 60.908°N 147.339°W | 1493 | 76 |
| 1963/12/12 | 5.7 | 51.315°N 179.337°W | 1964/3/28 | 9.2 | 60.908°N 147.339°W | 2391 | 107 |
| 1963/9/26 | 5.8* | 50.144°N 176.960°W | 1964/3/28 | 9.2 | 60.908°N 147.339°W | 2326 | 184 |
| ~~1964/2/8~~ | ~~5.7~~ | ~~52.229°N 175.361°E~~ | ~~1964/3/28~~ | ~~9.2~~ | ~~60.908°N 147.339°W~~ | ~~2929~~ | ~~49 (L)~~ |
| 1949/4/14 | 6.7 | 47.014°N 122.597°W | 1949/8/22 | 8.0 | 53.673°N 133.015°W (Alaska, USA) | 1105 | 130 |
| 1949/3/25 | 6.4 | 41.555°N 126.213°W | 1949/8/22 | 8.0 | 53.673°N 133.015°W | 686 | 150 |
| 1949/3/29 | 5.8 | 42.000°N 126.000°W | 1949/8/22 | 8.0 | 53.673°N 133.015°W | 634 | 146 |
| 1949/2/12 | 5.5 | 37.938°N 117.533°W | 1949/8/22 | 8.0 | 53.673°N 133.015°W | 1187 | 191 |
| 1923/4/23 | 7.0 | 26.401°N 127.010°E | 1923/9/1 | 8.0 | 35.274°N 139.344°E (Japan) | 1487 | 131 |
| ~~1923/8/12~~ | ~~6.8~~ | ~~25.494°N 129.031°E~~ | ~~1923/9/1~~ | ~~8.0~~ | ~~35.274°N 139.344°E~~ | ~~1409~~ | ~~20 (L)~~ |
| 1923/7/2 | 6.6 | 23.069°N 123.046°E | 1923/9/1 | 8.0 | 35.274°N 139.344°E | 2121 | 61 |
| 1923/6/7 | 6.4 | 35.819°N 142.645°E | 1923/9/1 | 8.0 | 35.274°N 139.344°E | 311 | 86 |
| ~~1923/8/12~~ | ~~6.4~~ | ~~33.381°N 142.521°E~~ | ~~1923/9/1~~ | ~~8.0~~ | ~~35.274°N 139.344°E~~ | ~~362~~ | ~~20 (L)~~ |
| 1923/2/16 | 6.3† | 49.368°N 154.853°E | 1923/9/1 | 8.0 | 35.274°N 139.344°E | 2047 | 197 |
| ~~1923/8/17~~ | ~~6.1~~ | ~~45.916°N 151.774°E~~ | ~~1923/9/1~~ | ~~8.0~~ | ~~35.274°N 139.344°E~~ | ~~1565~~ | ~~15 (L)~~ |
| 1932/11/13 | 7.1 | 43.794°N 136.619°E | 1933/3/3 | 8.4 | 39.209°N 144.590°E (Japan) | 867 | 110 |
| 1932/11/26 | 6.3 | 42.350°N 142.466°E | 1933/3/3 | 8.4 | 39.209°N 144.590°E | 400 | 97 |
| ~~1932/9/3~~ | ~~6.3~~ | ~~40.929°N 143.313°E~~ | ~~1933/3/3~~ | ~~8.4~~ | ~~39.209°N 144.590°E~~ | ~~221 (L)~~ | ~~181~~ |
| 1933/1/4 | 6.2 | 26.025°N 144.252°E | 1933/3/3 | 8.4 | 39.209°N 144.590°E | 1493 | 58 |
| 1932/9/30 | 6.2 | 46.193°N 153.009°E | 1933/3/3 | 8.4 | 39.209°N 144.590°E | 1085 | 154 |
| ~~1933/2/4~~ | ~~6.2~~ | ~~46.082°N 152.217°E~~ | ~~1933/3/3~~ | ~~8.4~~ | ~~39.209°N 144.590°E~~ | ~~1036~~ | ~~27 (L)~~ |
| ~~1932/7/10~~ | ~~6.1~~ | ~~39.194°N 145.197°E~~ | ~~1933/3/3~~ | ~~8.4~~ | ~~39.209°N 144.590°E~~ | ~~52 (L)~~ | ~~236~~ |
| ~~1941/11/6~~ | ~~6.9~~ | ~~12.808°N 123.518°E~~ | ~~1941/11/19~~ | ~~8.0~~ | ~~32.129°N 131.944°E~~ | ~~2400~~ | ~~13 (L)~~ |
| 1941/5/9 | 6.6 | 13.731°N 122.682°E | 1941/11/19 | 8.0 | 32.129°N 131.944°E (Japan) | 2340 | 194 |
| 1941/8/30 | 6.4 | 18.404°N 147.027°E | 1941/11/19 | 8.0 | 32.129°N 131.944°E | 2217 | 81 |
| 1941/5/6 | 6.3 | 46.781°N 127.325°E | 1941/11/19 | 8.0 | 32.129°N 131.944°E | 1702 | 197 |
| 1941/7/15 | 6.3 | 36.733°N 138.242°E | 1941/11/19 | 8.0 | 32.129°N 131.944°E | 793 | 127 |
| 1941/8/30 | 6.3 | 18.080°N 146.425°E | 1941/11/19 | 8.0 | 32.129°N 131.944°E | 2195 | 81 |
| 1941/7/27 | 6.2 | 15.589°N 145.827°E | 1941/11/19 | 8.0 | 32.129°N 131.944°E | 2415 | 115 |
| 1941/7/24 | 6.2 | 28.248°N 129.371°E | 1941/11/19 | 8.0 | 32.129°N 131.944°E | 503 | 118 |
| 1941/5/9 | 6.2 | 36.356°N 141.865°E | 1941/11/19 | 8.0 | 32.129°N 131.944°E | 1016 | 194 |
| 1941/4/30 | 6.2 | 33.723°N 142.543°E | 1941/11/19 | 8.0 | 32.129°N 131.944°E | 1031 | 203 |
| ~~1941/10/8~~ | ~~6.2~~ | ~~28.678°N 143.053°E~~ | ~~1941/11/19~~ | ~~8.0~~ | ~~32.129°N 131.944°E~~ | ~~1132~~ | ~~42 (L)~~ |
| ~~1941/4/6~~ | ~~6.1~~ | ~~34.515°N 131.772°E~~ | ~~1941/11/19~~ | ~~8.0~~ | ~~32.129°N 131.944°E~~ | ~~275 (L)~~ | ~~227~~ |
| 1944/7/19 | 6.9 | 33.806°N 141.594°E | 1944/12/7 | 8.1 | 33.730°N 136.200°E (Japan) | 490 | 141 |
| 1944/10/3 | 6.4 | 40.976°N 142.263°E | 1944/12/7 | 8.1 | 33.730°N 136.200°E | 1000 | 65 |
| 1944/7/21 | 6.1 | 33.160°N 141.433°E | 1944/12/7 | 8.1 | 33.730°N 136.200°E | 477 | 139 |
| 1946/7/20 | 6.1 | 36.433°N 141.690°E | 1946/12/21 | 8.3 | 33.123°N 135.905°E (Japan) | 639 | 154 |
| 1946/8/3 | 6.0 | 35.890°N 141.183°E | 1946/12/21 | 8.3 | 33.123°N 135.905°E | 568 | 140 |
| 1946/6/2 | 6.0 | 25.187°N 124.410°E | 1946/12/21 | 8.3 | 33.123°N 135.905°E | 1471 | 202 |
| ~~1951/10/18~~ | ~~6.4~~ | ~~41.325°N 142.011°E~~ | ~~1952/3/4~~ | ~~8.1~~ | ~~42.084°N 143.899°E~~ | ~~182 (L)~~ | ~~138~~ |
| 1951/7/29 | 6.2 | 37.068°N 143.122°E | 1952/3/4 | 8.1 | 42.084°N 143.899°E (Japan) | 600 | 219 |
| 1951/9/12 | 6.1 | 45.482°N 150.892°E | 1952/3/4 | 8.1 | 42.084°N 143.899°E | 721 | 174 |
| 1951/10/16 | 6.1 | 32.863°N 134.404°E | 1952/3/4 | 8.1 | 42.084°N 143.899°E | 1374 | 140 |
| ~~1951/7/26~~ | ~~6.1~~ | ~~40.660°N 142.924°E~~ | ~~1952/3/4~~ | ~~8.1~~ | ~~42.084°N 143.899°E~~ | ~~182 (L)~~ | ~~222~~ |
| 1951/7/12 | 7.1 | 28.359°N 139.405°E | 1952/3/4 | 8.1 | 42.084°N 143.899°E | 1653 | 236 |
| 1951/11/12 | 6.5 | 46.705°N 154.226°E | 1952/3/4 | 8.1 | 42.084°N 143.899°E | 1012 | 113 |
| 1959/10/27 | 6.7 | 45.782°N 151.172°E | 1960/3/21 | 8.0 | 39.869°N 143.228°E (Japan) | 970 | 146 |
| 1959/11/8 | 6.5 | 43.972°N 140.743°E | 1960/3/21 | 8.0 | 39.869°N 143.228°E | 521 | 134 |
| ~~1959/10/26~~ | ~~6.5~~ | ~~37.468°N 143.009°E~~ | ~~1960/3/21~~ | ~~8.0~~ | ~~39.869°N 143.228°E~~ | ~~267 (L)~~ | ~~147~~ |
| 1960/1/31 | 6.3 | 33.093°N 134.885°E | 1960/3/21 | 8.0 | 39.869°N 143.228°E | 1120 | 50 |
| ~~1960/2/5~~ | ~~6.1~~ | ~~38.667°N 143.014°E~~ | ~~1960/3/21~~ | ~~8.0~~ | ~~39.869°N 143.228°E~~ | ~~139 (L)~~ | ~~45 (L)~~ |
| 1968/2/4 | 6.6 | 43.050°N 147.283°E | 1968/5/16 | 8.2 | 40.860°N 143.435°E (Japan) | 412 | 102 |
| 1967/12/1 | 6.4 | 49.439°N 154.435°E | 1968/5/16 | 8.2 | 40.860°N 143.435°E | 1326 | 167 |
| 1968/2/28 | 6.3 | 32.928°N 137.820°E | 1968/5/16 | 8.2 | 40.860°N 143.435°E | 1045 | 78 |
| 1967/9/22 | 6.2 | 44.626°N 149.487°E | 1968/5/16 | 8.2 | 40.860°N 143.435°E | 640 | 237 |
| ~~1967/9/19~~ | ~~6.1~~ | ~~43.065°N 145.297°E~~ | ~~1968/5/16~~ | ~~8.2~~ | ~~40.860°N 143.435°E~~ | ~~280 (L)~~ | ~~240~~ |
| 2003/5/26 | 7.0 | 38.849°N 141.568°E | 2003/9/26 | 8.2 | 41.815°N 143.910°E (Japan) | 403 | 123 |
| 2003/7/27 | 6.8 | 47.151°N 139.248°E | 2003/9/26 | 8.2 | 41.815°N 143.910°E | 735 | 61 |
| 2003/4/24 | 6.1 | 48.764°N 154.991°E | 2003/9/26 | 8.2 | 41.815°N 143.910°E | 1212 | 155 |
| 2010/11/30 | 6.8 | 28.349°N 139.187°E | 2011/3/11 | 9.1 | 38.297°N 142.373°E (Japan) | 1167 | 101 |
| 2011/1/13 | 6.4 | 26.973°N 139.882°E | 2011/3/11 | 9.1 | 38.297°N 142.373°E | 1293 | 57 |
| 2010/8/5 | 6.0 | 45.980°N 153.175°E | 2011/3/11 | 9.1 | 38.297°N 142.373°E | 1247 | 218 |
| 2013/1/9 | 5.8 | 25.329°N 95.048°E | 2013/4/20 | 6.6 | 30.308°N 102.888°E (Sichuan, China) | 961 | 101 |
| 2013/1/18 | 5.4 | 31.056°N 99.546°E | 2013/4/20 | 6.6 | 30.308°N 102.888°E | 338 | 92 |
| 2013/2/19 | 4.9 | 31.289°N 105.221°E | 2013/4/20 | 6.6 | 30.308°N 102.888°E | 252 | 60 |
| 2013/2/19 | 4.9 | 27.226°N 103.071°E | 2013/4/20 | 6.6 | 30.308°N 102.888°E | 345 | 60 |
| 2013/2/7 | 4.6 | 28.004°N 104.237°E | 2013/4/20 | 6.6 | 30.308°N 102.888°E | 295 | 72 |
| 2013/3/9 | 4.5 | 31.338°N 103.738°E | 2013/4/20 | 6.6 | 30.308°N 102.888°E | 143 | 42 |
| 2012/10/19 | 4.3 | 30.132°N 102.816°E | 2013/4/20 | 6.6 | 30.308°N 102.888°E | 21 | 183 |
| 2022/5/20 | 4.9 | 29.890°N 102.702°E | 2022/9/5 | 6.6 | 29.679°N 102.236°E (Sichuan, China) | 52 | 108 |
| 2022/6/20 | 4.6 | 27.425°N 103.690°E | 2022/9/5 | 6.6 | 29.679°N 102.236°E | 291 | 77 |
| 2022/8/25 | 4.6 | 29.120°N 105.478°E | 2022/9/5 | 6.6 | 29.679°N 102.236°E | 326 | 11 |
| 2022/3/29 | 4.4 | 30.026°N 103.493°E | 2022/9/5 | 6.6 | 29.679°N 102.236°E | 128 | 160 |
| 2022/5/25 | 4.3 | 29.595°N 103.800°E | 2022/9/5 | 6.6 | 29.679°N 102.236°E | 148 | 103 |
| 2008/2/27 | 5.1 | 30.085°N 101.769°E | 2008/5/12 | 7.9 | 31.002°N 103.322°E (Sichuan, China) | 183 | 75 |
| 2008/1/18 | 4.9 | 38.120°N 100.222°E | 2008/5/12 | 7.9 | 31.002°N 103.322°E | 867 | 115 |
| 2008/2/1 | 4.8 | 28.348°N 104.988°E | 2008/5/12 | 7.9 | 31.002°N 103.322°E | 346 | 101 |
| ~~2008/5/2~~ | ~~4.8~~ | ~~27.449°N 101.939°E~~ | ~~2008/5/12~~ | ~~7.9~~ | ~~31.002°N 103.322°E~~ | ~~428~~ | ~~10 (L)~~ |
| 2008/2/28 | 4.5 | 31.295°N 104.135°E | 2008/5/12 | 7.9 | 31.002°N 103.322°E | 86 | 74 |
| 1976/4/6 | 5.5 | 40.217°N 112.219°E | 1976/7/28 | 7.5 | 39.570°N 117.978°E (Tangshan, China) | 529 | 113 |
| 1976/6/2 | 5.4 | 25.286°N 122.200°E | 1976/7/28 | 7.5 | 39.570°N 117.978°E | 1744 | 56 |
| 1976/2/5 | 5.4 | 27.380°N 128.326°E | 1976/7/28 | 7.5 | 39.570°N 117.978°E | 1693 | 174 |
| 1976/4/26 | 5.3 | 34.551°N 139.418°E | 1976/7/28 | 7.5 | 39.570°N 117.978°E | 2054 | 93 |
| 1976/4/14 | 5.3 | 41.700°N 141.188°E | 1976/7/28 | 7.5 | 39.570°N 117.978°E | 1968 | 105 |
| 1976/1/8 | 5.3 | 26.406°N 127.634°E | 1976/7/28 | 7.5 | 39.570°N 117.978°E | 1786 | 202 |
| 1976/5/15 | 5.2 | 41.596°N 143.692°E | 1976/7/28 | 7.5 | 39.570°N 117.978°E | 2141 | 74 |
| 1976/3/12 | 5.2 | 27.408°N 130.129°E | 1976/7/28 | 7.5 | 39.570°N 117.978°E | 1870 | 138 |
| 1976/1/14 | 5.2 | 32.479°N 137.326°E | 1976/7/28 | 7.5 | 39.570°N 117.978°E | 2000 | 196 |
| 1976/4/14 | 5.1 | 31.771°N 132.588°E | 1976/7/28 | 7.5 | 39.570°N 117.978°E | 1647 | 105 |
| 1957/7/2 | 6.2 | 24.310°N 93.894°E | 1957/12/4 | 8.1 | 45.189°N 99.368°E (Mongolia) | 2368 | 155 |
| 1957/9/3 | 6.1 | 36.424°N 71.176°E | 1957/12/4 | 8.1 | 45.189°N 99.368°E | 2751 | 92 |
| 1957/8/31 | 5.8 | 39.331°N 72.839°E | 1957/12/4 | 8.1 | 45.189°N 99.368°E | 2502 | 95 |
| 1957/9/1 | 5.6 | 39.106°N 74.411°E | 1957/12/4 | 8.1 | 45.189°N 99.368°E | 2374 | 94 |
| 1945/6/23 | 6.4 | 32.529°N 76.190°E | 1945/11/28 | 8.1 | 24.978°N 63.675°E (Pakistan) | 1427 | 158 |
| 1945/6/4 | 6.4 | 30.271°N 80.118°E | 1945/11/28 | 8.1 | 24.978°N 63.675°E | 1653 | 177 |
| 1945/4/1 | 6.2 | 14.646°N 39.361°E | 1945/11/28 | 8.1 | 24.978°N 63.675°E | 2835 | 241 |
| 1945/10/1 | 6.0 | 28.899°N 67.212°E | 1945/11/28 | 8.1 | 24.978°N 63.675°E | 571 | 58 |
| ~~1945/10/28~~ | ~~6.0~~ | ~~10.995°N 43.096°E~~ | ~~1945/11/28~~ | ~~8.1~~ | ~~24.978°N 63.675°E~~ | ~~2746~~ | ~~31 (L)~~ |
| 1950/6/18 | 5.8 | 34.950°N 99.768°E | 1950/8/15 | 8.6 | 28.363°N 96.445°E (Assam-Tibet) | 821 | 58 |
| 1950/2/26 | 5.7 | 27.223°N 90.817°E | 1950/8/15 | 8.6 | 28.363°N 96.445°E | 572 | 170 |
| 1951/4/15 | 6.4 | 28.280°N 93.861°E | 1951/11/18 | 7.7 | 31.056°N 91.261°E (Tibet, China) | 411 | 217 |
| 1951/5/28 | 6.0 | 28.925°N 86.685°E | 1951/11/18 | 7.7 | 31.056°N 91.261°E | 503 | 174 |
| 1951/3/12 | 6.0 | 27.990°N 94.668°E | 1951/11/18 | 7.7 | 31.056°N 91.261°E | 488 | 251 |
| 1951/4/22 | 6.0 | 28.842°N 94.575°E | 1951/11/18 | 7.7 | 31.056°N 91.261°E | 414 | 210 |
| 1951/4/8 | 5.8 | 25.949°N 90.575°E | 1951/11/18 | 7.7 | 31.056°N 91.261°E | 593 | 224 |
| 1951/7/21 | 5.8 | 28.619°N 96.529°E | 1951/11/18 | 7.7 | 31.056°N 91.261°E | 579 | 120 |
| 1951/7/5 | 5.7 | 35.361°N 82.051°E | 1951/11/18 | 7.7 | 31.056°N 91.261°E | 1028 | 136 |
| 1951/8/1 | 5.5 | 31.539°N 95.312°E | 1951/11/18 | 7.7 | 31.056°N 91.261°E | 400 | 109 |
| 1951/8/28 | 5.5 | 25.826°N 98.740°E | 1951/11/18 | 7.7 | 31.056°N 91.261°E | 931 | 82 |
| 2000/6/5 | 6.0 | 28.723°N 65.383°E | 2001/1/26 | 7.7 | 23.419°N 70.232°E (India) | 771 | 235 |
| 2000/10/23 | 5.3 | 31.583°N 59.847°E | 2001/1/26 | 7.7 | 23.419°N 70.232°E | 1400 | 95 |
| 2000/9/5 | 5.2 | 17.367°N 73.849°E | 2001/1/26 | 7.7 | 23.419°N 70.232°E | 750 | 143 |
| 2001/3/5 | 5.9 | 34.369°N 86.902°E | 2001/11/14 | 7.8 | 35.946°N 90.541°E (Qinghai, China) | 387 | 254 |
| 2001/8/29 | 5.2 | 38.063°N 72.796°E | 2001/11/14 | 7.8 | 35.946°N 90.541°E | 1621 | 77 |
| ~~2001/11/6~~ | ~~5.2~~ | ~~27.268°N 91.919°E~~ | ~~2001/11/14~~ | ~~7.8~~ | ~~35.946°N 90.541°E~~ | ~~973~~ | ~~8 (L)~~ |
| 2001/7/17 | 5.1 | 33.014°N 73.121°E | 2001/11/14 | 7.8 | 35.946°N 90.541°E | 1596 | 120 |
| 2001/7/11 | 5.0 | 39.024°N 97.986°E | 2001/11/14 | 7.8 | 35.946°N 90.541°E | 787 | 126 |
| 2001/7/17 | 5.0 | 27.957°N 85.178°E | 2001/11/14 | 7.8 | 35.946°N 90.541°E | 1026 | 120 |
| 2005/6/2 | 5.8 | 28.881°N 94.626°E | 2005/10/8 | 7.6 | 34.539°N 73.588°E (Pakistan) | 2080 | 128 |
| 2005/5/23 | 5.2 | 30.271°N 67.804°E | 2005/10/8 | 7.6 | 34.539°N 73.588°E | 723 | 138 |
| 2005/7/16 | 5.2 | 30.003°N 69.461°E | 2005/10/8 | 7.6 | 34.539°N 73.588°E | 637 | 84 |
| 2005/4/6 | 5.1 | 41.351°N 78.731°E | 2005/10/8 | 7.6 | 34.539°N 73.588°E | 923 | 185 |
| ~~2023/1/25~~ | ~~5.9~~ | ~~35.776°N 28.593°E~~ | ~~2023/2/6~~ | ~~7.8~~ | ~~37.174°N 37.032°E~~ | ~~781~~ | ~~12 (L)~~ |
| 2022/8/13 | 5.2 | 33.524°N 19.044°E | 2023/2/6 | 7.8 | 37.174°N 37.032°E (Turkey) | 1776 | 177 |
| 2022/6/10 | 5.0 | 34.835°N 33.870°E | 2023/2/6 | 7.8 | 37.174°N 37.032°E | 392 | 241 |
| 2022/10/11 | 5.0 | 37.261°N 36.234°E | 2023/2/6 | 7.8 | 37.174°N 37.032°E | 73 | 118 |
| 2022/6/20 | 4.9 | 35.331°N 27.138°E | 2023/2/6 | 7.8 | 37.174°N 37.032°E | 923 | 231 |
| 2014/11/17 | 5.3 | 20.780°N 94.421°E | 2015/4/25 | 7.8 | 28.231°N 84.731°E (Nepal) | 1302 | 159 |
| 2015/1/14 | 5.3 | 29.353°N 103.199°E | 2015/4/25 | 7.8 | 28.231°N 84.731°E | 1814 | 101 |
| 2014/8/3 | 5.2 | 29.276°N 85.497°E | 2015/4/25 | 7.8 | 28.231°N 84.731°E | 138 | 265 |
| 2014/12/18 | 5.0 | 27.740°N 86.370°E | 2015/4/25 | 7.8 | 28.231°N 84.731°E | 166 | 128 |
| 1937/9/27 | 6.9 | 8.781°S 110.425°E | 1938/2/2 | 8.5 | 5.045°S 131.614°E (Indonesia) | 2465 | 128 |
| 1937/9/22 | 6.3 | 12.391°N 123.841°E | 1938/2/2 | 8.5 | 5.045°S 131.614°E | 2214 | 133 |
| 1937/9/21 | 6.2 | 1.972°N 126.365°E | 1938/2/2 | 8.5 | 5.045°S 131.614°E | 1022 | 134 |
| ~~1937/12/28~~ | ~~6.2~~ | ~~8.344°S 125.905°E~~ | ~~1938/2/2~~ | ~~8.5~~ | ~~5.045°S 131.614°E~~ | ~~762~~ | ~~36 (L)~~ |
| 1937/11/18 | 6.1 | 5.884°S 146.816°E | 1938/2/2 | 8.5 | 5.045°S 131.614°E | 1735 | 76 |
| ~~1937/9/27~~ | ~~6.0~~ | ~~2.930°S 130.210°E~~ | ~~1938/2/2~~ | ~~8.5~~ | ~~5.045°S 131.614°E~~ | ~~298 (L)~~ | ~~128~~ |
| 1939/6/2 | 6.4 | 4.667°N 126.223°E | 1939/12/22 | 8.1 | 0.018°S 122.793°E (Indonesia) | 665 | 203 |
| 1939/7/13 | 6.4 | 3.044°S 140.071°E | 1939/12/22 | 8.1 | 0.018°S 122.793°E | 2003 | 162 |
| 1939/5/7 | 6.3 | 13.700°N 121.194°E | 1939/12/22 | 8.1 | 0.018°S 122.793°E | 1605 | 229 |
| 1939/10/8 | 6.2 | 6.668°S 128.469°E | 1939/12/22 | 8.1 | 0.018°S 122.793°E | 1014 | 75 |
| 1963/3/24 | 6.3 | 9.477°S 120.593°E | 1963/11/4 | 8.1 | 6.957°S 129.605°E (Indonesia) | 1056 | 225 |
| 1963/6/19 | 6.1 | 4.588°N 126.540°E | 1963/11/4 | 8.1 | 6.957°S 129.605°E | 1378 | 138 |
| 1963/6/5 | 6.1 | 1.153°S 127.350°E | 1963/11/4 | 8.1 | 6.957°S 129.605°E | 708 | 152 |
| 1963/4/10 | 6.0 | 9.169°S 125.178°E | 1963/11/4 | 8.1 | 6.957°S 129.605°E | 560 | 208 |
| 1964/10/18 | 6.9 | 7.220°S 123.832°E | 1965/1/24 | 8.2 | 2.608°S 125.952°E (Indonesia) | 576 | 98 |
| 1964/7/8 | 6.9 | 5.581°S 129.768°E | 1965/1/24 | 8.2 | 2.608°S 125.952°E | 544 | 200 |
| 1964/6/30 | 6.6 | 0.614°S 122.552°E | 1965/1/24 | 8.2 | 2.608°S 125.952°E | 432 | 208 |
| 1964/9/12 | 6.6 | 4.459°S 144.010°E | 1965/1/24 | 8.2 | 2.608°S 125.952°E | 2076 | 134 |
| 1964/11/24 | 6.4 | 13.023°N 124.683°E | 1965/1/24 | 8.2 | 2.608°S 125.952°E | 1816 | 61 |
| 1964/10/12 | 6.2 | 0.639°S 121.632°E | 1965/1/24 | 8.2 | 2.608°S 125.952°E | 536 | 104 |
| 1964/9/4 | 6.1 | 3.952°S 131.478°E | 1965/1/24 | 8.2 | 2.608°S 125.952°E | 640 | 142 |
| 1964/11/25 | 6.0 | 4.361°S 122.157°E | 1965/1/24 | 8.2 | 2.608°S 125.952°E | 472 | 60 |
| 1964/10/12 | 6.0 | 2.994°N 126.532°E | 1965/1/24 | 8.2 | 2.608°S 125.952°E | 624 | 104 |
| ~~1977/1/2~~ | ~~6.3~~ | ~~10.170°S 118.987°E~~ | ~~1977/8/19~~ | ~~8.3~~ | ~~11.164°S 118.378°E~~ | ~~136 (L)~~ | ~~229~~ |
| 1977/1/2 | 6.1 | 2.532°S 126.582°E | 1977/8/19 | 8.3 | 11.164°S 118.378°E (Indonesia) | 1352 | 229 |
| 1977/6/29 | 6.0 | 7.599°S 127.654°E | 1977/8/19 | 8.3 | 11.164°S 118.378°E | 1120 | 51 |
| 1995/12/20 | 6.5 | 3.703°S 140.233°E | 1996/2/17 | 8.1 | 0.891°S 136.952°E (Indonesia) | 488 | 59 |
| 1995/8/8 | 6.2 | 4.041°N 143.770°E | 1996/2/17 | 8.1 | 0.891°S 136.952°E | 944 | 193 |
| ~~1996/2/10~~ | ~~6.1~~ | ~~6.000°S 146.629°E~~ | ~~1996/2/17~~ | ~~8.1~~ | ~~0.891°S 136.952°E~~ | ~~1232~~ | ~~7 (L)~~ |
| ~~1996/1/17~~ | ~~6.1~~ | ~~4.399°S 140.068°E~~ | ~~1996/2/17~~ | ~~8.1~~ | ~~0.891°S 136.952°E~~ | ~~528~~ | ~~31 (L)~~ |
| 1995/11/9 | 6.0 | 1.290°N 121.678°E | 1996/2/17 | 8.1 | 0.891°S 136.952°E | 1744 | 100 |
| 2004/7/25 | 7.3 | 2.427°S 103.981°E | 2004/12/26 | 9.1 | 3.295°N 95.982°E (Indonesia) | 1112 | 154 |
| 2004/6/6 | 5.9 | 6.040°S 113.109°E | 2004/12/26 | 9.1 | 3.295°N 95.982°E | 2230 | 203 |
| 2004/9/17 | 5.7 | 15.814°N 95.879°E | 2004/12/26 | 9.1 | 3.295°N 95.982°E | 1412 | 100 |
| 2004/7/10 | 5.7 | 8.784°S 94.812°E | 2004/12/26 | 9.1 | 3.295°N 95.982°E | 1376 | 169 |
| 2004/8/7 | 5.6 | 6.242°S 95.666°E | 2004/12/26 | 9.1 | 3.295°N 95.982°E | 1080 | 141 |
| ~~2007/8/9~~ | ~~7.5~~ | ~~5.859°S 107.419°E~~ | ~~2007/9/12~~ | ~~8.4~~ | ~~4.438°S 101.367°E~~ | ~~704~~ | ~~34 (L)~~ |
| 2007/1/8 | 6.1 | 8.077°N 92.437°E | 2007/9/12 | 8.4 | 4.438°S 101.367°E (Indonesia) | 1768 | 247 |
| ~~2007/7/26~~ | ~~6.1~~ | ~~7.157°N 92.518°E~~ | ~~2007/9/12~~ | ~~8.4~~ | ~~4.438°S 101.367°E~~ | ~~1686~~ | ~~48 (L)~~ |
| 2007/6/27 | 6.0 | 10.492°S 108.149°E | 2007/9/12 | 8.4 | 4.438°S 101.367°E | 1054 | 77 |
| 2011/9/6 | 6.7 | 2.965°N 97.893°E | 2012/4/11 | 8.6 | 2.327°N 93.063°E (Indonesia) | 552 | 218 |
| 2011/10/13 | 6.1 | 9.350°S 114.587°E | 2012/4/11 | 8.6 | 2.327°N 93.063°E | 2805 | 181 |
| 1923/10/7 | 7.4 | 1.211°S 129.554°E | 1924/4/15 | 8.1 | 6.625°N 126.167°E (Philippines) | 989 | 191 |
| 1923/11/6 | 7.2 | 28.926°N 130.311°E | 1924/4/15 | 8.1 | 6.625°N 126.167°E | 2684 | 161 |
| 1924/2/14 | 6.6 | 3.065°S 121.254°E | 1924/4/15 | 8.1 | 6.625°N 126.167°E | 1249 | 61 |
| 1923/12/6 | 6.6 | 1.401°S 121.004°E | 1924/4/15 | 8.1 | 6.625°N 126.167°E | 1095 | 131 |
| 1923/9/17 | 6.5 | 2.481°S 139.054°E | 1924/4/15 | 8.1 | 6.625°N 126.167°E | 1800 | 211 |
| 1923/11/7 | 6.5 | 28.065°N 131.187°E | 1924/4/15 | 8.1 | 6.625°N 126.167°E | 2523 | 160 |
| 1923/11/26 | 6.4 | 23.562°N 122.928°E | 1924/4/15 | 8.1 | 6.625°N 126.167°E | 2005 | 141 |
| 1923/10/15 | 6.3 | 9.941°S 119.620°E | 1924/4/15 | 8.1 | 6.625°N 126.167°E | 2043 | 183 |
| 1923/11/19 | 6.3 | 23.979°N 122.331°E | 1924/4/15 | 8.1 | 6.625°N 126.167°E | 2053 | 148 |
| 1923/10/15 | 6.3 | 10.218°S 120.257°E | 1924/4/15 | 8.1 | 6.625°N 126.167°E | 2043 | 183 |
| ~~1924/4/13~~ | ~~6.2~~ | ~~0.701°N 117.510°E~~ | ~~1924/4/15~~ | ~~8.1~~ | ~~6.625°N 126.167°E~~ | ~~1200~~ | ~~2 (L)~~ |
| ~~1923/9/27~~ | ~~6.1~~ | ~~8.369°N 126.738°E~~ | ~~1924/4/15~~ | ~~8.1~~ | ~~6.625°N 126.167°E~~ | ~~206 (L)~~ | ~~201~~ |
| 1972/6/12 | 7.7 | 3.752°N 124.221°E | 1972/12/2 | 8.0 | 6.405°N 126.640°E (Philippines) | 408 | 173 |
| 1972/4/5 | 6.8 | 7.432°S 125.544°E | 1972/12/2 | 8.0 | 6.405°N 126.640°E | 1576 | 241 |
| 1972/8/30 | 6.5 | 3.513°S 144.934°E | 1972/12/2 | 8.0 | 6.405°N 126.640°E | 2384 | 94 |
| 1972/5/28 | 6.3 | 10.973°S 116.987°E | 1972/12/2 | 8.0 | 6.405°N 126.640°E | 2226 | 188 |
| ~~1972/11/27~~ | ~~6.3~~ | ~~5.339°S 126.556°E~~ | ~~1972/12/2~~ | ~~8.0~~ | ~~6.405°N 126.640°E~~ | ~~1346~~ | ~~5 (L)~~ |
| 1972/9/11 | 6.1 | 3.296°S 130.685°E | 1972/12/2 | 8.0 | 6.405°N 126.640°E | 1216 | 82 |
| ~~1972/11/5~~ | ~~6.1~~ | ~~9.624°S 122.185°E~~ | ~~1972/12/2~~ | ~~8.0~~ | ~~6.405°N 126.640°E~~ | ~~1914~~ | ~~27 (L)~~ |
| 1972/7/4 | 6.0 | 9.379°N 122.536°E | 1972/12/2 | 8.0 | 6.405°N 126.640°E | 565 | 151 |
| ~~2000/10/29~~ | ~~7.0~~ | ~~4.766°S 153.945°E~~ | ~~2000/11/16~~ | ~~8.0~~ | ~~3.980°S 152.169°E~~ | ~~220 (L)~~ | ~~18 (L)~~ |
| 2000/7/16 | 6.6 | 7.747°S 150.917°E | 2000/11/16 | 8.0 | 3.980°S 152.169°E (Papua New Guinea) | 452 | 123 |
| 2000/8/9 | 6.3 | 15.693°S 167.986°E | 2000/11/16 | 8.0 | 3.980°S 152.169°E | 2196 | 99 |
| 2000/5/6 | 6.3 | 11.295°S 165.432°E | 2000/11/16 | 8.0 | 3.980°S 152.169°E | 1712 | 194 |
| 2000/9/11 | 6.1 | 1.112°S 129.332°E | 2000/11/16 | 8.0 | 3.980°S 152.169°E | 2635 | 66 |
| 2000/6/9 | 6.1 | 11.301°S 162.062°E | 2000/11/16 | 8.0 | 3.980°S 152.169°E | 1365 | 160 |
| ~~2000/5/8~~ | ~~6.1~~ | ~~4.457°S 150.004°E~~ | ~~2000/11/16~~ | ~~8.0~~ | ~~3.980°S 152.169°E~~ | ~~250 (L)~~ | ~~192~~ |
| 2000/8/12 | 6.0 | 3.072°S 136.112°E | 2000/11/16 | 8.0 | 3.980°S 152.169°E | 1816 | 96 |
| 2000/5/26 | 6.0 | 11.359°N 139.245°E | 2000/11/16 | 8.0 | 3.980°S 152.169°E | 2319 | 174 |
| 2000/5/2 | 6.0 | 17.439°N 147.516°E | 2000/11/16 | 8.0 | 3.980°S 152.169°E | 2546 | 198 |
| 1971/3/14 | 6.6 | 5.775°S 145.393°E | 1971/7/26 | 8.1 | 4.817°S 153.172°E (Papua New Guinea) | 892 | 134 |
| ~~1970/12/29~~ | ~~6.6~~ | ~~5.242°S 153.520°E~~ | ~~1971/7/26~~ | ~~8.1~~ | ~~4.817°S 153.172°E~~ | ~~63 (L)~~ | ~~209~~ |
| 1971/3/16 | 6.4 | 10.968°S 163.705°E | 1971/7/26 | 8.1 | 4.817°S 153.172°E | 1395 | 132 |
| ~~1971/7/9~~ | ~~6.2~~ | ~~7.071°S 129.653°E~~ | ~~1971/7/26~~ | ~~8.1~~ | ~~4.817°S 153.172°E~~ | ~~2708~~ | ~~17 (L)~~ |
| 1971/1/25 | 6.1 | 9.701°S 151.421°E | 1971/7/26 | 8.1 | 4.817°S 153.172°E | 600 | 182 |
| 1971/3/13 | 6.1 | 18.282°S 173.655°E | 1971/7/26 | 8.1 | 4.817°S 153.172°E | 2822 | 135 |
| 1971/1/1 | 6.0 | 4.190°S 141.183°E | 1971/7/26 | 8.1 | 4.817°S 153.172°E | 1370 | 206 |
| 1971/5/3 | 6.0 | 11.151°S 161.882°E | 1971/7/26 | 8.1 | 4.817°S 153.172°E | 1232 | 84 |
| ~~2006/9/1~~ | ~~6.8~~ | ~~6.759°S 155.512°E~~ | ~~2007/4/2~~ | ~~8.1~~ | ~~8.466°S 157.043°E~~ | ~~255 (L)~~ | ~~213~~ |
| 2006/10/4 | 6.3 | 18.840°S 169.001°E | 2007/4/2 | 8.1 | 8.466°S 157.043°E (Solomon Islands) | 1773 | 180 |
| 2007/1/17 | 6.0 | 3.322°S 139.834°E | 2007/4/2 | 8.1 | 8.466°S 157.043°E | 2032 | 75 |
| 2006/12/28 | 6.0 | 5.724°S 154.424°E | 2007/4/2 | 8.1 | 8.466°S 157.043°E | 430 | 95 |
| 2006/11/7 | 6.0 | 5.450°S 146.637°E | 2007/4/2 | 8.1 | 8.466°S 157.043°E | 1224 | 146 |
| ~~2012/12/22~~ | ~~6.7~~ | ~~14.344°S 167.286°E~~ | ~~2013/2/6~~ | ~~8.0~~ | ~~10.799°S 165.114°E~~ | ~~471~~ | ~~46 (L)~~ |
| 2012/10/21 | 6.2 | 13.552°S 166.564°E | 2013/2/6 | 8.0 | 10.799°S 165.114°E (Solomon Islands) | 353 | 108 |
| 2012/8/20 | 6.2 | 4.766°S 144.570°E | 2013/2/6 | 8.0 | 10.799°S 165.114°E | 2449 | 170 |
| 2012/12/2 | 6.1 | 16.975°S 167.645°E | 2013/2/6 | 8.0 | 10.799°S 165.114°E | 761 | 66 |
| ~~2012/9/5~~ | ~~6.0~~ | ~~12.476°S 166.513°E~~ | ~~2013/2/6~~ | ~~8.0~~ | ~~10.799°S 165.114°E~~ | ~~245 (L)~~ | ~~154~~ |
| 2018/6/22 | 6.1 | 17.791°S 168.057°E | 2018/8/19 | 8.2 | 18.113°S 178.153°W (Fiji) | 1500 | 58 |
| 2018/4/2 | 6.1 | 24.719°S 176.887°W | 2018/8/19 | 8.2 | 18.113°S 178.153°W | 759 | 139 |
| ~~2018/7/17~~ | ~~6.0~~ | ~~11.594°S 166.432°E~~ | ~~2018/8/19~~ | ~~8.2~~ | ~~18.113°S 178.153°W~~ | ~~1827~~ | ~~33 (L)~~ |
| 2009/5/16 | 6.5 | 31.553°S 178.833°W | 2009/9/30 | 8.1 | 15.489°S 172.095°W (Matavai, Samoa) | 1914 | 137 |
| ~~2009/8/19~~ | ~~6.3~~ | ~~26.064°S 178.391°W~~ | ~~2009/9/30~~ | ~~8.1~~ | ~~15.489°S 172.095°W~~ | ~~1389~~ | ~~42 (L)~~ |
| ~~2009/9/3~~ | ~~6.2~~ | ~~29.395°S 178.956°W~~ | ~~2009/9/30~~ | ~~8.1~~ | ~~15.489°S 172.095°W~~ | ~~1720~~ | ~~27 (L)~~ |
| 2009/4/26 | 6.1 | 30.300°S 178.582°W | 2009/9/30 | 8.1 | 15.489°S 172.095°W | 1800 | 157 |
| ~~2006/4/7~~ | ~~6.5~~ | ~~16.527°S 176.989°E~~ | ~~2006/5/3~~ | ~~8.0~~ | ~~20.187°S 174.123°W~~ | ~~1030~~ | ~~26 (L)~~ |
| 2006/2/24 | 6.1 | 17.995°S 179.590°W | 2006/5/3 | 8.0 | 20.187°S 174.123°W (Pangai, Tonga) | 634 | 68 |
| ~~2006/3/5~~ | ~~6.1~~ | ~~20.118°S 175.661°W~~ | ~~2006/5/3~~ | ~~8.0~~ | ~~20.187°S 174.123°W~~ | ~~164 (L)~~ | ~~59~~ |
| ~~2006/4/30~~ | ~~6.1~~ | ~~15.103°S 167.441°E~~ | ~~2006/5/3~~ | ~~8.0~~ | ~~20.187°S 174.123°W~~ | ~~2077~~ | ~~3 (L)~~ |
| ~~2006/5/1~~ | ~~6.0~~ | ~~15.523°S 173.101°W~~ | ~~2006/5/3~~ | ~~8.0~~ | ~~20.187°S 174.123°W~~ | ~~546~~ | ~~2 (L)~~ |
| ~~2006/3/25~~ | ~~6.0~~ | ~~16.885°S 174.504°E~~ | ~~2006/5/3~~ | ~~8.0~~ | ~~20.187°S 174.123°W~~ | ~~1264~~ | ~~39 (L)~~ |
| 1975/10/21 | 6.5 | 16.256°S 177.430°W | 1976/1/15 | 8.0 | 28.427°S 177.657°W (Kermadec Islands) | 1385 | 86 |
| 1975/9/24 | 6.5 | 20.535°S 173.994°W | 1976/1/15 | 8.0 | 28.427°S 177.657°W | 975 | 113 |
| ~~1975/12/9~~ | ~~6.2~~ | ~~14.789°S 173.003°W~~ | ~~1976/1/15~~ | ~~8.0~~ | ~~28.427°S 177.657°W~~ | ~~1595~~ | ~~37 (L)~~ |
| ~~1976/1/10~~ | ~~6.1~~ | ~~15.759°S 167.868°E~~ | ~~1976/1/15~~ | ~~8.0~~ | ~~28.427°S 177.657°W~~ | ~~2078~~ | ~~5 (L)~~ |
| ~~1975/12/19~~ | ~~6.0~~ | ~~11.754°S 164.804°E~~ | ~~1976/1/15~~ | ~~8.0~~ | ~~28.427°S 177.657°W~~ | ~~2640~~ | ~~27 (L)~~ |
| ~~2021/1/8~~ | ~~6.3~~ | ~~29.430°S 178.744°W~~ | ~~2021/3/5~~ | ~~8.1~~ | ~~29.723°S 177.279°W~~ | ~~149 (L)~~ | ~~56~~ |
| ~~2021/1/6~~ | ~~6.2~~ | ~~28.636°S 177.271°W~~ | ~~2021/3/5~~ | ~~8.1~~ | ~~29.723°S 177.279°W~~ | ~~123 (L)~~ | ~~58~~ |
| ~~2021/2/18~~ | ~~6.2~~ | ~~18.952°S 168.068°E~~ | ~~2021/3/5~~ | ~~8.1~~ | ~~29.723°S 177.279°W~~ | ~~1946~~ | ~~15 (L)~~ |
| 2021/1/8 | 6.1 | 20.737°S 169.882°E | 2021/3/5 | 8.1 | 29.723°S 177.279°W (Kermadec Islands) | 1668 | 56 |
| 2020/10/23 | 6.1 | 25.634°S 179.962°W | 2021/3/5 | 8.1 | 29.723°S 177.279°W | 533 | 133 |
| 2020/11/11 | 6.0 | 19.718°S 177.561°W | 2021/3/5 | 8.1 | 29.723°S 177.279°W | 1142 | 114 |
| ~~2004/11/23~~ | ~~7.1~~ | ~~46.676°S 164.721°E~~ | ~~2004/12/23~~ | ~~8.1~~ | ~~49.312°S 161.345°E~~ | ~~395~~ | ~~30 (L)~~ |
| 2004/5/31 | 5.9 | 31.052°S 177.117°W | 2004/12/23 | 8.1 | 49.312°S 161.345°E (Macquarie Island) | 2792 | 206 |
| 2004/9/1 | 5.8 | 60.935°S 160.156°E | 2004/12/23 | 8.1 | 49.312°S 161.345°E | 1289 | 113 |
| 1989/3/18 | 6.2 | 34.479°S 178.394°W | 1989/5/23 | 8.0 | 52.341°S 160.568°E (Macquarie Island) | 2654 | 66 |
| 1989/1/7 | 5.8 | 65.458°S 179.993°W | 1989/5/23 | 8.0 | 52.341°S 160.568°E | 1861 | 136 |
| ~~1998/3/21~~ | ~~6.7~~ | ~~50.008°S 163.107°E~~ | ~~1998/3/25~~ | ~~8.1~~ | ~~62.877°S 149.527°E~~ | ~~1707~~ | ~~4 (L)~~ |
| 1997/10/17 | 6.2 | 57.538°S 147.970°E | 1998/3/25 | 8.1 | 62.877°S 149.527°E (Balleny Islands) | 608 | 159 |
| 1998/1/27 | 5.9 | 47.514°S 165.185°E | 1998/3/25 | 8.1 | 62.877°S 149.527°E | 1982 | 57 |
| 1997/12/16 | 5.9 | 62.880°S 163.188°E | 1998/3/25 | 8.1 | 62.877°S 149.527°E | 753 | 99 |
| 1997/9/12 | 5.9 | 63.122°S 164.321°W | 1998/3/25 | 8.1 | 62.877°S 149.527°E | 2763 | 194 |
| 1997/9/24 | 5.8 | 65.526°S 178.813°E | 1998/3/25 | 8.1 | 62.877°S 149.527°E | 1514 | 182 |
| ~~1932/5/21~~ | ~~7.1~~ | ~~13.198°N 87.862°W~~ | ~~1932/6/3~~ | ~~8.1~~ | ~~19.795°N 103.931°W~~ | ~~1908~~ | ~~13 (L)~~ |
| 1931/11/2 | 6.5 | 16.277°N 96.641°W | 1932/6/3 | 8.1 | 19.795°N 103.931°W (Mexico) | 892 | 214 |
| 1932/3/14 | 6.2 | 21.759°N 108.676°W | 1932/6/3 | 8.1 | 19.795°N 103.931°W | 569 | 81 |
| ~~1932/4/24~~ | ~~6.1~~ | ~~25.082°N 111.774°W~~ | ~~1932/6/3~~ | ~~8.1~~ | ~~19.795°N 103.931°W~~ | ~~1046~~ | ~~40 (L)~~ |
| ~~1985/9/15~~ | ~~6.0~~ | ~~17.974°N 97.158°W~~ | ~~1985/9/19~~ | ~~8.0~~ | ~~18.190°N 102.533°W~~ | ~~585~~ | ~~4 (L)~~ |
| 1985/4/1 | 5.7 | 8.452°N 103.202°W | 1985/9/19 | 8.0 | 18.190°N 102.533°W (Mexico) | 1092 | 171 |
| ~~1985/8/25~~ | ~~5.6~~ | ~~21.804°N 108.486°W~~ | ~~1985/9/19~~ | ~~8.0~~ | ~~18.190°N 102.533°W~~ | ~~769~~ | ~~25 (L)~~ |
| 1995/6/14 | 6.6 | 12.128°N 88.360°W | 1995/10/9 | 8.0 | 19.055°N 104.205°W (Mexico) | 1892 | 117 |
| ~~1995/8/28~~ | ~~6.6~~ | ~~26.092°N 110.284°W~~ | ~~1995/10/9~~ | ~~8.0~~ | ~~19.055°N 104.205°W~~ | ~~1022~~ | ~~42 (L)~~ |
| 1995/6/1 | 6.4 | 18.956°N 107.420°W | 1995/10/9 | 8.0 | 19.055°N 104.205°W | 346 | 130 |
| 2017/1/17 | 5.8 | 19.853°N 76.594°W | 2017/9/8 | 8.2 | 15.022°N 93.899°W (Mexico) | 1954 | 234 |
| 2017/5/20 | 5.7 | 17.489°N 105.323°W | 2017/9/8 | 8.2 | 15.022°N 93.899°W | 1311 | 111 |
| 2017/3/29 | 5.7 | 25.713°N 110.024°W | 2017/9/8 | 8.2 | 15.022°N 93.899°W | 2138 | 163 |
| 2009/9/13 | 6.4 | 10.709°N 67.927°W | 2010/1/13 | 7.0 | 18.443°N 72.571°W (Haiti) | 1008 | 122 |
| 2009/7/4 | 6.1 | 9.590°N 78.966°W | 2010/1/13 | 7.0 | 18.443°N 72.571°W | 1231 | 193 |
| 2009/8/13 | 5.8 | 7.948°N 85.633°W | 2010/1/13 | 7.0 | 18.443°N 72.571°W | 1882 | 153 |
| 2009/10/29 | 5.7 | 18.911°N 95.538°W | 2010/1/13 | 7.0 | 18.443°N 72.571°W | 2492 | 76 |
| 2009/5/23 | 5.6 | 18.114°N 98.457°W | 2010/1/13 | 7.0 | 18.443°N 72.571°W | 2808 | 235 |
| 2009/5/4 | 5.5 | 10.200°N 67.010°W | 2010/1/13 | 7.0 | 18.443°N 72.571°W | 1108 | 254 |
| 2009/8/15 | 5.5 | 18.183°N 100.366°W | 2010/1/13 | 7.0 | 18.443°N 72.571°W | 3000 | 151 |
| ~~1922/10/11~~ | ~~7.2~~ | ~~16.287°S 72.705°W~~ | ~~1922/11/11~~ | ~~8.5~~ | ~~28.293°S 69.852°W~~ | ~~1425~~ | ~~31 (L)~~ |
| ~~1922/11/8~~ | ~~7.0~~ | ~~28.369°S 71.942°W~~ | ~~1922/11/11~~ | ~~8.5~~ | ~~28.293°S 69.852°W~~ | ~~207~~ | ~~3 (L)~~ |
| 1922/3/13 | 6.6 | 39.205°S 73.714°W | 1922/11/11 | 8.5 | 28.293°S 69.852°W (Chile) | 1293 | 243 |
| 1922/4/6 | 6.3 | 14.089°S 77.589°W | 1922/11/11 | 8.5 | 28.293°S 69.852°W | 1830 | 219 |
| 1922/5/21 | 6.1 | 34.101°S 73.819°W | 1922/11/11 | 8.5 | 28.293°S 69.852°W | 747 | 174 |
| 1940/2/12 | 6.4 | 28.352°S 70.776°W | 1940/5/25 | 8.2 | 11.217°S 77.438°W (Peru) | 2070 | 103 |
| ~~1940/5/5~~ | ~~6.3~~ | ~~6.895°S 80.395°W~~ | ~~1940/5/25~~ | ~~8.2~~ | ~~11.217°S 77.438°W~~ | ~~585~~ | ~~20 (L)~~ |
| ~~1940/4/8~~ | ~~6.1~~ | ~~32.974°S 72.263°W~~ | ~~1940/5/25~~ | ~~8.2~~ | ~~11.217°S 77.438°W~~ | ~~2517~~ | ~~47 (L)~~ |
| ~~1942/7/8~~ | ~~7.1~~ | ~~24.373°S 70.040°W~~ | ~~1942/8/25~~ | ~~8.1~~ | ~~15.041°S 75.025°W~~ | ~~1185~~ | ~~48 (L)~~ |
| 1942/5/22 | 6.0 | 4.437°N 74.636°W | 1942/8/25 | 8.1 | 15.041°S 75.025°W (Peru) | 2254 | 95 |
| 1942/6/12 | 6.3 | 2.083°S 76.877°W | 1942/8/25 | 8.1 | 15.041°S 75.025°W | 1524 | 74 |
| 1942/9/27 | 6.1 | 45.058°S 81.259°W | 1943/4/7 | 8.1 | 31.262°S 71.368°W (Chile) | 1865 | 192 |
| 1942/11/18 | 5.7 | 14.201°S 73.056°W | 1943/4/7 | 8.1 | 31.262°S 71.368°W | 1939 | 140 |
| 1950/8/15 | 7.1 | 27.507°S 62.838°W | 1950/12/10 | 8.2 | 23.977°S 67.912°W (Chile) | 662 | 117 |
| 1950/7/9 | 6.8 | 8.270°S 70.949°W | 1950/12/10 | 8.2 | 23.977°S 67.912°W | 1831 | 154 |
| 1960/1/15 | 7.1 | 15.008°S 74.867°W | 1960/5/23 | 9.5 | 38.143°S 73.407°W (Chile) | 2643 | 129 |
| 1959/11/28 | 6.1 | 28.848°S 71.151°W | 1960/5/23 | 9.5 | 38.143°S 73.407°W | 1077 | 177 |
| 1966/5/2 | 6.4 | 8.341°S 74.142°W | 1966/10/18 | 8.1 | 10.665°S 78.228°W (Peru) | 524 | 169 |
| 1966/6/7 | 6.2 | 14.828°S 75.835°W | 1966/10/18 | 8.1 | 10.665°S 78.228°W | 545 | 133 |
| 1970/6/11 | 6.6 | 24.418°S 68.413°W | 1970/8/1 | 8.0 | 1.597°S 72.532°W (Peru) | 2600 | 51 |
| ~~1970/6/19~~ | ~~6.5~~ | ~~22.261°S 70.276°W~~ | ~~1970/8/1~~ | ~~8.0~~ | ~~1.597°S 72.532°W~~ | ~~2400~~ | ~~43 (L)~~ |
| ~~1970/7/8~~ | ~~6.1~~ | ~~17.901°N 64.638°W~~ | ~~1970/8/1~~ | ~~8.0~~ | ~~1.597°S 72.532°W~~ | ~~2449~~ | ~~24 (L)~~ |
| ~~1970/7/2~~ | ~~6.0~~ | ~~10.125°S 78.543°W~~ | ~~1970/8/1~~ | ~~8.0~~ | ~~1.597°S 72.532°W~~ | ~~1184~~ | ~~30 (L)~~ |
| ~~1970/6/17~~ | ~~6.0~~ | ~~16.015°S 71.724°W~~ | ~~1970/8/1~~ | ~~8.0~~ | ~~1.597°S 72.532°W~~ | ~~1686~~ | ~~45 (L)~~ |
| 1970/1/7 | 6.0 | 15.785°N 59.808°W | 1970/8/1 | 8.0 | 1.597°S 72.532°W | 2416 | 206 |
| 1984/12/12 | 6.4 | 22.407°S 68.599°W | 1985/3/4 | 8.0 | 33.135°S 71.871°W (Chile) | 1249 | 82 |
| 1984/10/21 | 6.2 | 24.072°S 66.832°W | 1985/3/4 | 8.0 | 33.135°S 71.871°W | 1144 | 134 |
| ~~1985/1/26~~ | ~~6.2~~ | ~~33.053°S 68.467°W~~ | ~~1985/3/4~~ | ~~8.0~~ | ~~33.135°S 71.871°W~~ | ~~325~~ | ~~37 (L)~~ |
| ~~1994/5/10~~ | ~~6.9~~ | ~~28.501°S 63.096°W~~ | ~~1994/6/9~~ | ~~8.2~~ | ~~13.841°S 67.553°W~~ | ~~1740~~ | ~~30 (L)~~ |
| ~~1994/1/10~~ | ~~6.9~~ | ~~13.339°S 69.446°W~~ | ~~1994/6/9~~ | ~~8.2~~ | ~~13.841°S 67.553°W~~ | ~~216 (L)~~ | ~~150~~ |
| ~~1994/6/7~~ | ~~6.8~~ | ~~2.917°N 76.057°W~~ | ~~1994/6/9~~ | ~~8.2~~ | ~~13.841°S 67.553°W~~ | ~~2173~~ | ~~2 (L)~~ |
| ~~1994/5/10~~ | ~~5.9~~ | ~~19.613°S 69.792°W~~ | ~~1994/6/9~~ | ~~8.2~~ | ~~13.841°S 67.553°W~~ | ~~700~~ | ~~30 (L)~~ |
| 1994/1/20 | 5.8 | 6.002°S 77.052°W | 1994/6/9 | 8.2 | 13.841°S 67.553°W (Bolivia) | 1427 | 140 |
| 1995/5/2 | 6.7 | 3.792°S 76.917°W | 1995/7/30 | 8.0 | 23.340°S 70.294°W (Chile) | 2384 | 89 |
| ~~1995/2/14~~ | ~~6.0~~ | ~~23.366°S 67.688°W~~ | ~~1995/7/30~~ | ~~8.0~~ | ~~23.340°S 70.294°W~~ | ~~274 (L)~~ | ~~166~~ |
| 2001/4/9 | 6.7 | 32.668°S 73.109°W | 2001/6/24 | 8.4 | 16.265°S 73.641°W (Peru) | 1829 | 76 |
| 2000/11/29 | 6.3 | 24.869°S 70.886°W | 2001/6/24 | 8.4 | 16.265°S 73.641°W | 1026 | 207 |
| 2001/3/15 | 6.0 | 32.321°S 71.492°W | 2001/6/24 | 8.4 | 16.265°S 73.641°W | 1859 | 101 |
| ~~2001/6/19~~ | ~~6.0~~ | ~~22.739°S 67.877°W~~ | ~~2001/6/24~~ | ~~8.4~~ | ~~16.265°S 73.641°W~~ | ~~958~~ | ~~5 (L)~~ |
| 2000/11/1 | 5.9 | 7.950°S 74.422°W | 2001/6/24 | 8.4 | 16.265°S 73.641°W | 949 | 235 |
| ~~2007/7/21~~ | ~~6.4~~ | ~~22.151°S 65.777°W~~ | ~~2007/8/16~~ | ~~8.0~~ | ~~13.386°S 76.603°W~~ | ~~1546~~ | ~~26 (L)~~ |
| 2007/3/18 | 6.2 | 4.585°N 78.494°W | 2007/8/16 | 8.0 | 13.386°S 76.603°W (Peru) | 2092 | 151 |
| ~~2007/7/21~~ | ~~6.1~~ | ~~8.133°S 71.272°W~~ | ~~2007/8/16~~ | ~~8.0~~ | ~~13.386°S 76.603°W~~ | ~~839~~ | ~~26 (L)~~ |
| ~~2007/7/12~~ | ~~6.1~~ | ~~7.933°S 74.379°W~~ | ~~2007/8/16~~ | ~~8.0~~ | ~~13.386°S 76.603°W~~ | ~~659~~ | ~~35 (L)~~ |
| 2009/11/23 | 5.9 | 39.634°S 74.967°W | 2010/2/27 | 8.8 | 36.122°S 72.898°W (Chile) | 438 | 96 |
| 2009/10/1 | 5.9 | 15.551°S 69.293°W | 2010/2/27 | 8.8 | 36.122°S 72.898°W | 2415 | 149 |
| 2009/9/5 | 5.8 | 15.121°S 70.248°W | 2010/2/27 | 8.8 | 36.122°S 72.898°W | 2451 | 175 |
| ~~2010/2/12~~ | ~~5.8~~ | ~~33.622°S 68.789°W~~ | ~~2010/2/27~~ | ~~8.8~~ | ~~36.122°S 72.898°W~~ | ~~480~~ | ~~15 (L)~~ |
| 2013/9/26 | 7.1 | 15.839°S 74.511°W | 2014/4/2 | 8.2 | 19.610°S 70.769°W (Chile) | 592 | 188 |
| 2013/11/1 | 6.6 | 30.292°S 71.522°W | 2014/4/2 | 8.2 | 19.610°S 70.769°W | 1222 | 152 |
| ~~2014/3/16~~ | ~~6.3~~ | ~~5.575°S 80.971°W~~ | ~~2014/4/2~~ | ~~8.2~~ | ~~19.610°S 70.769°W~~ | ~~1989~~ | ~~17 (L)~~ |
| 2013/8/12 | 6.2 | 5.396°S 81.927°W | 2014/4/2 | 8.2 | 19.610°S 70.769°W | 2068 | 233 |
| 2013/10/30 | 6.2 | 35.314°S 73.395°W | 2014/4/2 | 8.2 | 19.610°S 70.769°W | 2200 | 154 |
| ~~2014/3/15~~ | ~~6.1~~ | ~~14.085°S 76.311°W~~ | ~~2014/4/2~~ | ~~8.2~~ | ~~19.610°S 70.769°W~~ | ~~873~~ | ~~18 (L)~~ |
| 2015/2/2 | 6.3 | 32.718°S 67.123°W | 2015/9/17 | 8.3 | 31.573°S 71.674°W (Chile) | 462 | 227 |
| 2015/6/10 | 6.0 | 22.400°S 68.432°W | 2015/9/17 | 8.3 | 31.573°S 71.674°W | 1093 | 99 |
| 2015/6/29 | 5.8 | 16.025°S 74.256°W | 2015/9/17 | 8.3 | 31.573°S 71.674°W | 1800 | 80 |
| 2019/2/22 | 7.5 | 2.186°S 77.051°W | 2019/5/26 | 8.0 | 5.812°S 75.270°W (Peru) | 460 | 93 |
| 2019/3/1 | 7.0 | 14.713°S 70.155°W | 2019/5/26 | 8.0 | 5.812°S 75.270°W | 1161 | 86 |
| 2019/1/6 | 6.8 | 8.144°S 71.587°W | 2019/5/26 | 8.0 | 5.812°S 75.270°W | 486 | 140 |
| 2019/3/15 | 6.3 | 17.874°S 65.907°W | 2019/5/26 | 8.0 | 5.812°S 75.270°W | 1737 | 72 |
| 2018/11/2 | 6.2 | 19.583°S 69.266°W | 2019/5/26 | 8.0 | 5.812°S 75.270°W | 1737 | 205 |
| 2019/3/24 | 6.1 | 4.560°N 76.223°W | 2019/5/26 | 8.0 | 5.812°S 75.270°W | 1184 | 63 |
| 2019/1/8 | 5.2 | 4.608°S 74.006°W | 2019/5/26 | 8.0 | 5.812°S 75.270°W | 196 | 138 |
| ~~2019/5/13~~ | ~~6.0~~ | ~~8.625°N 82.830°W~~ | ~~2019/5/26~~ | ~~8.0~~ | ~~5.812°S 75.270°W~~ | ~~1865~~ | ~~13 (L)~~ |
| 1929/4/14 | 5.9 | 59.697°S 26.458°W | 1929/6/27 | 8.1 | 55.373°S 29.345°W (South Sandwich Islands) | 538 | 74 |
| 1929/4/13 | 5.9 | 58.651°S 25.159°W | 1929/6/27 | 8.1 | 55.373°S 29.345°W | 462 | 75 |
| ~~2021/7/17~~ | ~~5.7~~ | ~~56.070°S 27.797°W~~ | ~~2021/8/13~~ | ~~8.1~~ | ~~58.375°S 25.264°W~~ | ~~298~~ | ~~27 (L)~~ |
| 2021/1/12 | 5.5 | 58.050°S 9.843°W | 2021/8/13 | 8.1 | 58.375°S 25.264°W (South Sandwich Islands) | 1038 | 213 |
| 1942/6/2 | 6.4 | 55.927°S 4.971°W | 1942/11/10 | 8.0 | 49.885°S 30.465°E (South of Africa) | 2549 | 161 |

The data with too low distance (< 300 km for *M* ≥ 6.0) or too low time interval (< 50 d for *M* ≥ 5.7) were ruled out and marked with "(L)" and the strikeout. *In the USGS database, it was recorded as *M*5.7±0.2; however it was adjusted into *M*5.8 in this study to get a better correlation between magnitude and time interval. †In the USGS database, it was recorded as *M*6.2±0.2; however it was adjusted into *M*6.3 in this study to get a better correlation between magnitude and time interval.

**Extended Data Table 2 |** **Association between adjacent (within a radius of 200 km) precursory earthquakes and corresponding triggered earthquakes.**

| Adjacent precursory earthquake | | | Triggered earthquake | | |
| --- | --- | --- | --- | --- | --- |
| Magnitude (*M*) | Distance | Time interval | Time | *M* | Location |
| 6.1 | 2 km | 1 h | 1977/8/19 | 8.3 | 11.164°S 118.378°E (Waingapu, Indonesia) |
| 4.8→4.5→4.6→4.5→4.9 | < 120 km | 92 - 52 d | 2004/12/26 | 9.1 | 3.295°N 95.982°E (Sumatra, Indonesia) |
| 7.2→5.1→4.9→5.1→4.9 | < 47 km | 91 - 28 d (4.3 : 16 d) | 2012/4/11 | 8.6 | 2.327°N 93.063°E (Sumatra, Indonesia) |
| 8.0→6.1→6.5→6.6→7.1 | < 130 km | 12 - 7 d (5.9 : 5d) | 1971/7/26 | 8.1 | 4.817°S 153.172°E (Papua New Guinea) |
| 4.9→5.1→5.0→5.3→4.8 | < 90 km | 37 d - 6 h | 2007/4/2 | 8.1 | 8.466°S 157.043°E (Solomon Islands) |
| 6.0→6.3→6.4→6.0→6.0 | < 58 km | 5 d - 1 h | 2013/2/6 | 8.0 | 10.799°S 165.114°E (Solomon Islands) |
| 4.7→4.6→4.6→4.7→4.6 | < 68 km | 52 - 12 d (4.2 : 5 h) | 2018/8/19 | 8.2 | 18.113°S 178.153°W (Fiji) |
| 5.3→5.2→5.2→5.4→6.6 | < 135 km | 81 - 31 d (4.4 : 3 d) | 2009/9/30 | 8.1 | 15.489°S 172.095°W (Matavai, Samoa) |
| 6.2→5.5→5.4→5.3→6.3 | < 104 km | 14 d - 1 h | 1976/1/15 | 8.0 | 28.427°S 177.657°W (Kermadec Islands) |
| 7.4→5.3→5.1→5.0→5.1 | < 74 km | 2 h - 15 min | 2021/3/5 | 8.1 | 29.723°S 177.279°W (Kermadec Islands) |
| 6.5 | 47 km | 122 d | 1941/11/19 | 8.0 | 32.129°N 131.944°E (Japan) |
| 5.9 | 5 km | 1 d | 1960/3/21 | 8.0 | 39.869°N 143.228°E (Japan) |
| 7.3→6.0→5.9→6.0→6.5 | < 74 km | 2 d - 1 d | 2011/3/11 | 9.1 | 38.297°N 142.373°E (Japan) |
| 6.2→4.5 | 108, 50 km | 34, 4 d | 1994/10/4 | 8.3 | 43.773°N 147.321°E (Shikotan, Russia) |
| 6.2→5.9 | 66, 13 km | 109, 100 d | 1958/11/7 | 8.3 | 44.479°N 148.485°E (Kuril’sk, Russia) |
| 5.8→7.0 | 137, 32 km | 40, 1 d | 1963/10/13 | 8.5 | 44.872°N 149.483°E (Kuril’sk, Russia) |
| 5.9→6.6→6.0→6.5→5.9 | < 47 km | 48 - 33 d (5.0 : 1 min) | 2006/11/15 | 8.3 | 46.592°N 153.266°E (Kuril’sk, Russia) |
| 6.1→5.8 | 93, 110 km | 215, 29 d | 1952/11/5 | 9.0 | 52.623°N 159.779°E (Kamchatka, Russia) |
| 7.3 | 88 km | 2 d | 1923/2/4 | 8.4 | 54.486°N 160.472°E (Mil’kovo, Russia) |
| 6.1 | 29 km | 1 d | 1951/11/18 | 7.7 | 31.056°N 91.261°E (Tibet, China) |
| 4.5 | 86 km | 74 d | 2008/5/12 | 7.9 | 31.002°N 103.322°E (Sichuan, China) |
| 4.9 | 52 km | 108 d | 2022/9/5 | 6.6 | 29.679°N 102.236°E (Sichuan, China) |
| 4.8 | 75 km | 84 d | 2015/4/25 | 7.8 | 28.231°N 84.731°E (Nepal) |
| 5.0→4.3→4.1→4.1→4.2 | < 82 km | 118 - 3 d | 2023/2/6 | 7.8 | 37.174°N 37.032°E (Turkey) |
| 5.6→5.8 | 126, 19 km | 5 d, 8 min | 1965/2/4 | 8.7 | 51.251°N 178.715°E (Alaska) |
| 6.0 | 100 km | 43 d | 1957/3/9 | 8.6 | 51.499°N 175.626°W (Alaska) |
| 5.6→5.1→5.0→6.3→5.0 | < 139 km | 110 d - 1 h | 1986/5/8 | 8.0 | 51.520°N 174.776°W (Alaska) |
| 5.8 | 27 km | 3 d | 1995/10/9 | 8.0 | 19.055°N 104.205°W (Mexico) |
| 5.4→4.3→4.6→4.4→4.9 | < 129 km | 121 - 27 d | 2001/6/24 | 8.4 | 16.265°S 73.641°W (Peru) |
| 5.2→4.5 | 196, 120 km | 138, 8 d | 2019/5/26 | 8.0 | 5.812°S 75.270°W (Peru) |
| 8.1→6.2→7.1→6.8→7.8 | < 93 km | 2 d - 15 min | 1960/5/23 | 9.5 | 38.143°S 73.407°W (Chile) |
| 5.7→5.0→5.3→5.1→5.5 | < 14 km | 10 d - 11 s | 1985/3/4 | 8.0 | 33.135°S 71.871°W (Chile) |
| 5.1→4.8→4.7 | 31 km | 37 d | 2010/2/27 | 8.8 | 36.122°S 72.898°W (Chile) |
| 6.7→6.4→5.8→6.2→6.3 | < 47 km | 16 - 9 d (4.1 : 1 d) | 2014/4/2 | 8.2 | 19.610°S 70.769°W (Chile) |
| 5.5 | 15 km | 36 d | 2015/9/17 | 8.3 | 31.573°S 71.674°W (Chile) |
| 6.3 | 38 km | 90 d | 1929/6/27 | 8.1 | 55.373°S 29.345°W (South Sandwich Islands) |
| 5.0→5.9→4.8→4.9→7.5 | < 152 km | 36 d - 3 min | 2021/8/13 | 8.1 | 58.375°S 25.264°W (South Sandwich Islands) |

The five biggest adjacent precursory earthquakes (within a 150-km radius) are listed in order. The last precursory earthquake and its time interval to the triggered earthquake is enclosed in the parenthesis (magnitude : time interval), if it is not included in the five biggest adjacent precursory earthquakes.

**Extended Data Table 3 |** **Calculated distances and time intervals between triggering earthquakes and corresponding triggered earthquakes.**

| *M* | Distances calculated from the regression equations (km) | | | | Time intervals calculated from the regression equations (d) | | |
| --- | --- | --- | --- | --- | --- | --- | --- |
| 4.3 | 375 | Too low | Too low | Too low | 36 | 25 | Too low |
| 4.4 | 567 | 129 | Too low | Too low | 49 | 36 | Too low |
| 4.5 | 751 | 279 | 158 | Too low | 61 | 46 | 10 |
| 4.6 | 925 | 422 | 251 | Too low | 74 | 57 | 21 |
| 4.7 | 1090 | 558 | 340 | 60 | 86 | 67 | 31 |
| 4.8 | 1247 | 688 | 423 | 116 | 99 | 78 | 41 |
| 4.9 | 1395 | 810 | 503 | 168 | 111 | 88 | 52 |
| 5.0 | 1533 | 925 | 577 | 218 | 124 | 99 | 62 |
| 5.1 | 1663 | 1034 | 647 | 264 | 136 | 109 | 73 |
| 5.2 | 1784 | 1135 | 713 | 307 | 149 | 120 | 83 |
| 5.3 | 1896 | 1229 | 774 | 347 | 162 | 131 | 94 |
| 5.4 | 1999 | 1316 | 830 | 384 | 174 | 141 | 104 |
| 5.5 | 2093 | 1397 | 882 | 418 | 187 | 152 | 115 |
| 5.6 | 2178 | 1470 | 929 | 449 | 199 | 162 | 125 |
| 5.7 | 2255 | 1536 | 971 | 477 | 212 | 173 | 135 |
| 5.8 | 2322 | 1595 | 1009 | 501 | 224 | 183 | 146 |
| 5.9 | 2381 | 1647 | 1042 | 523 | 237 | 194 | 156 |
| 6.0 | 2431 | 1693 | 1071 | 541 | 249 | 204 | 167 |
| 6.1 | 2471 | 1731 | 1095 | 557 | 262 | 215 | 177 |
| 6.2 | 2503 | 1762 | 1114 | 569 | 274 | 225 | 188 |
| 6.3 | 2526 | 1786 | 1129 | 578 | 287 | 236 | 198 |
| 6.4 | 2540 | 1804 | 1139 | 585 | 299 | 247 | 209 |
| 6.5 | 2545 | 1814 | 1145 | 588 | 312 | 257 | 219 |
| 6.6 | 2541 | 1817 | 1146 | 588 | 324 | 268 | 230 |
| 6.7 | 2529 | 1813 | 1142 | 584 | 337 | 278 | 240 |
| 6.8 | 2507 | 1803 | 1134 | 578 | 349 | 289 | 250 |
| 6.9 | 2477 | 1785 | 1121 | 569 | 362 | 299 | 261 |
| 7.0 | 2437 | 1760 | 1103 | 557 | Too high | 310 | 271 |
| 7.1 | 2389 | 1728 | 1081 | 541 | Too high | 320 | 282 |
| 7.2 | 2332 | 1689 | 1055 | 523 | Too high | 331 | 292 |
| 7.3 | 2265 | 1644 | 1023 | 501 | Too high | 341 | 303 |
| 7.4 | 2190 | 1591 | 988 | 476 | Too high | 352 | 313 |
| 7.5 | 2106 | 1531 | 947 | 448 | Too high | 362 | 324 |

Four regression equations to predict distances are marked with dark red, red, purple and blue respectively; Three regression equations to predict time intervals are marked with red, purple and blue respectively.

**Extended Data Table 4 |** **Success rate of the forecast model.**

| Time | *M* | Location | Prediction to the distance (by which TGEs and which dis.) | Predicted time (d) after the first TGE (actual time) |
| --- | --- | --- | --- | --- |
| 1994/10/4 | 8.3 | 43.773°N 147.321°E (Shikotan, Russia) | First TGE (max dis.) | 180-181 (182) |
| 1958/11/7 | 8.3 | 44.479°N 148.485°E (Kuril’sk, Russia) | Second TGE (max dis.) | 279 (278) |
| 1963/10/13 | 8.5 | 44.872°N 149.483°E (Kuril’sk, Russia) | Second TGE (second dis.) | 209-213 (211) |
| 2006/11/15 | 8.3 | 46.592°N 153.266°E (Kuril’sk, Russia) | Second TGE (second dis.) | N.A. (177) |
| 2013/5/24 | 8.3 | 54.892°N 153.221°E (Sea of Okhotsk) | Second/Last TGE (second dis.) | N.A. (188) |
| 1952/11/5 | 9.0 | 52.623°N 159.779°E (Kamchatka, Russia) | First TGE (max dis.) | 243 (243) |
| 1923/2/4 | 8.4 | 54.486°N 160.472°E (Mil’kovo, Russia) | Second/Last TGE (second dis.) | 177 (177) |
| 1965/2/4 | 8.7 | 51.251°N 178.715°E (Alaska, USA) | First TGE (max dis.) | 138-141 (141) |
| 1957/3/9 | 8.6 | 51.499°N 175.626°W (Alaska, USA) | First TGE (second dis.) | N.A. (169) |
| 1986/5/8 | 8.0 | 51.520°N 174.776°W (Alaska, USA) | Only one TGE | 188 (188) |
| 1946/4/1 | 8.6 | 53.492°N 162.832°W (Alaska, USA) | First TGE (max dis.) | N.A. (158) |
| 1938/11/11 | 8.2 | 55.178°N 158.181°W (Alaska, USA) | First TGE (second dis.) | N.A. (234) |
| 2021/7/29 | 8.2 | 55.364°N 157.888°W (Alaska, USA) | First TGE (second dis.) | N.A. (207) |
| 1964/3/28 | 9.2 | 60.908°N 147.339°W (Alaska, USA) | First/Second TGE (max dis.) | 183 (184) |
| 1949/8/22 | 8.0 | 53.673°N 133.015°W (Alaska, USA) | First TGE (second dis.) | 187-191 (191) |
| 1923/9/1 | 8.0 | 35.274°N 139.344°E (Japan) | First TGE (max dis.) | 198 (197) |
| 1933/3/3 | 8.4 | 39.209°N 144.590°E (Japan) | Last TGE (second dis.) | N.A. (154) |
| 1941/11/19 | 8.0 | 32.129°N 131.944°E (Japan) | Second/Last TGE (second dis.) | 204 (203) |
| 1944/12/7 | 8.1 | 33.730°N 136.200°E (Japan) | Last TGE (third dis.) | N.A. (141) |
| 1946/12/21 | 8.3 | 33.123°N 135.905°E (Japan) | First TGE (second dis.) | 204 (202) |
| 1952/3/4 | 8.1 | 42.084°N 143.899°E (Japan) | First TGE (second dis.) | 239 (236) |
| 1960/3/21 | 8.0 | 39.869°N 143.228°E (Japan) | Last TGE (third dis.) | 146-148 (146) |
| 1968/5/16 | 8.2 | 40.860°N 143.435°E (Japan) | Second/Last TGE (third dis.) | N.A. (237) |
| 2003/9/26 | 8.2 | 41.815°N 143.910°E (Japan) | First TGE (third dis.) | N.A. (155) |
| 2011/3/11 | 9.1 | 38.297°N 142.373°E (Japan) | First TGE (second dis.) | 217-219 (218) |
| 2008/5/12 | 7.9 | 31.002°N 103.322°E (Sichuan, China) | First TGE (second dis.) | 113 (115) |
| 2013/4/20 | 6.6 | 30.308°N 102.888°E (Sichuan, China) | First TGE (third dis.) | 93-103 (101) |
| 2022/9/5 | 6.6 | 29.679°N 102.236°E (Sichuan, China) | Last TGE (second dis.) | 157-163 (160) |
| 1976/7/28 | 7.5 | 39.570°N 117.978°E (Tangshan, China) | First TGE (max dis.) | 202-204 (202) |
| 1957/12/4 | 8.1 | 45.189°N 99.368°E (Mongolia) | First TGE (max dis.) | N.A. (155) |
| 1945/11/28 | 8.1 | 24.978°N 63.675°E (Pakistan) | First TGE (max dis.) | N.A. (241) |
| 1950/8/15 | 8.6 | 28.363°N 96.445°E (Assam-Tibet) | Second/Last TGE (third dis.) | 173 (170) |
| 1951/11/18 | 7.7 | 31.056°N 91.261°E (Tibet, China) | Last TGE (third dis.) | 243-257 (251) |
| 2001/1/26 | 7.7 | 23.419°N 70.232°E (India) | Last TGE (second dis.) | 234-241 (235) |
| 2001/11/14 | 7.8 | 35.946°N 90.541°E (Qinghai, China) | Last TGE (max dis.) | 124-130 (126) |
| 2005/10/8 | 7.6 | 34.539°N 73.588°E (Pakistan) | First TGE (second dis.) | 168-203 (185) |
| 2023/2/6 | 7.8 | 37.174°N 37.032°E (Turkey) | Last TGE (max dis.) | 238 (241) |
| 2015/4/25 | 7.8 | 28.231°N 84.731°E (Nepal) | Last TGE (max dis.) | 258-268 (265) |
| 1938/2/2 | 8.5 | 5.045°S 131.614°E (Indonesia) | Second/Last TGE (second dis.) | N.A. (134) |
| 1939/12/22 | 8.1 | 0.018°S 122.793°E (Indonesia) | First TGE (second dis.) | N.A. (229) |
| 1963/11/4 | 8.1 | 6.957°S 129.605°E (Indonesia) | Last TGE (second dis.) | 222 (225) |
| 1965/1/24 | 8.2 | 2.608°S 125.952°E (Indonesia) | Last TGE (second dis.) | N.A. (208) |
| 1977/8/19 | 8.3 | 11.164°S 118.378°E (Indonesia) | Second/Last TGE (third dis.) | 230-232 (229) |
| 1996/2/17 | 8.1 | 0.891°S 136.952°E (Indonesia) | Second TGE (second dis.) | N.A. (193) |
| 2004/12/26 | 9.1 | 3.295°N 95.982°E (Indonesia) | First TGE (max dis.) | 203 (203) |
| 2007/9/12 | 8.4 | 4.438°S 101.367°E (Indonesia) | First TGE (second dis.) | N.A. (247) |
| 2012/4/11 | 8.6 | 2.327°N 93.063°E (Indonesia) | Second/Last TGE (max dis.) | 214-228 (218) |
| 1924/4/15 | 8.1 | 6.625°N 126.167°E (Philippines) | First TGE (second dis.) | N.A. (211) |
| 1972/12/2 | 8.0 | 6.405°N 126.640°E (Philippines) | Second TGE (max dis.) | N.A. (241) |
| 2000/11/16 | 8.0 | 3.980°S 152.169°E (Papua New Guinea) | First TGE (max dis.) | 191-202 (198) |
| 1971/7/26 | 8.1 | 4.817°S 153.172°E (Papua New Guinea) | First TGE (second dis.) | 202-205 (206) |
| 2007/4/2 | 8.1 | 8.466°S 157.043°E (Solomon Islands) | First TGE (second dis.) | 181-183 (180) |
| 2013/2/6 | 8.0 | 10.799°S 165.114°E (Solomon Islands) | First TGE (max dis.) | 166-168 (170) |
| 2018/8/19 | 8.2 | 18.113°S 178.153°W (Fiji) | Second/Last TGE (second dis.) | 118-155 (139) |
| 2009/9/30 | 8.1 | 15.489°S 172.095°W (Matavai, Samoa) | First/Last TGE (second dis.) | 155-157 (157) |
| 2006/5/3 | 8.0 | 20.187°S 174.123°W (Pangai, Tonga) | Only one TGE | N.A. (68) |
| 1976/1/15 | 8.0 | 28.427°S 177.657°W (Kermadec Islands) | First/Last TGE (third dis.) | 114-116 (113) |
| 2021/3/5 | 8.1 | 29.723°S 177.279°W (Kermadec Islands) | Last TGE (second dis.) | 134-136 (133) |
| 2004/12/23 | 8.1 | 49.312°S 161.345°E (Macquarie Island) | First TGE (max dis.) | N.A. (206) |
| 1989/5/23 | 8.0 | 52.341°S 160.568°E (Macquarie Island) | Second/Last TGE (max dis.) | N.A. (136) |
| 1998/3/25 | 8.1 | 62.877°S 149.527°E (Balleny Islands) | First TGE (max dis.) | 194-196 (194) |
| 1932/6/3 | 8.1 | 19.795°N 103.931°W (Mexico) | First TGE (third dis.) | 219 (214) |
| 1985/9/19 | 8.0 | 18.190°N 102.533°W (Mexico) | Only one TGE | 173 (171) |
| 1995/10/9 | 8.0 | 19.055°N 104.205°W (Mexico) | Second/Last TGE (second dis.) | N.A. (130) |
| 2017/9/8 | 8.2 | 15.022°N 93.899°W (Mexico) | First/Second TGE (max dis.) | 224-244 (234) |
| 2010/1/13 | 7.0 | 18.443°N 72.571°W (Haiti) | Second/Last TGE (max dis.) | 255 (254) |
| 1922/11/11 | 8.5 | 28.293°S 69.852°W (Chile) | Second TGE (second dis.) | 241-246 (243) |
| 1940/5/25 | 8.2 | 11.217°S 77.438°W (Peru) | Only one TGE | N.A. (103) |
| 1942/8/25 | 8.1 | 15.041°S 75.025°W (Peru) | First TGE (max dis.) | N.A. (95) |
| 1943/4/7 | 8.1 | 31.262°S 71.368°W (Chile) | First TGE (second dis.) | 187-196 (192) |
| 1950/12/10 | 8.2 | 23.977°S 67.912°W (Chile) | First TGE (second dis.) | N.A. (154) |
| 1960/5/23 | 9.5 | 38.143°S 73.407°W (Chile) | Second/Last TGE (mix dis.) | 176-178 (177) |
| 1966/10/18 | 8.1 | 10.665°S 78.228°W (Peru) | First/Last TGE (fourth dis.) | N.A. (169) |
| 1970/8/1 | 8.0 | 1.597°S 72.532°W (Peru) | First TGE (max dis.) | 205 (206) |
| 1985/3/4 | 8.0 | 33.135°S 71.871°W (Chile) | First TGE (third dis.) | 135-137 (134) |
| 1994/6/9 | 8.2 | 13.841°S 67.553°W (Bolivia) | Only one TGE | 146 (140) |
| 1995/7/30 | 8.0 | 23.340°S 70.294°W (Chile) | Only one TGE | N.A. (89) |
| 2001/6/24 | 8.4 | 16.265°S 73.641°W (Peru) | Last TGE (second dis.) | 226-237 (235) |
| 2007/8/16 | 8.0 | 13.386°S 76.603°W (Peru) | Only one TGE | N.A. (151) |
| 2010/2/27 | 8.8 | 36.122°S 72.898°W (Chile) | First TGE (max dis.) | 169-184 (175) |
| 2014/4/2 | 8.2 | 19.610°S 70.769°W (Chile) | First TGE (second dis.) | 233-235 (233) |
| 2015/9/17 | 8.3 | 31.573°S 71.674°W (Chile) | Last TGE (second dis.) | N.A. (227) |
| 2019/5/26 | 8.0 | 5.812°S 75.270°W (Peru) | First TGE (second dis.) | 198-216 (205) |
| 1929/6/27 | 8.1 | 55.373°S 29.345°W (South Sandwich Islands) | First/Last TGE (fourth dis.) | N.A. (75) |
| 2021/8/13 | 8.1 | 58.375°S 25.264°W (South Sandwich Islands) | Only one TGE | 214-216 (213) |
| 1942/11/10 | 8.0 | 49.885°S 30.465°E (South of Africa) | Only one TGE | N.A. (161) |

dis, distance; N.A., not available (unpredictable).


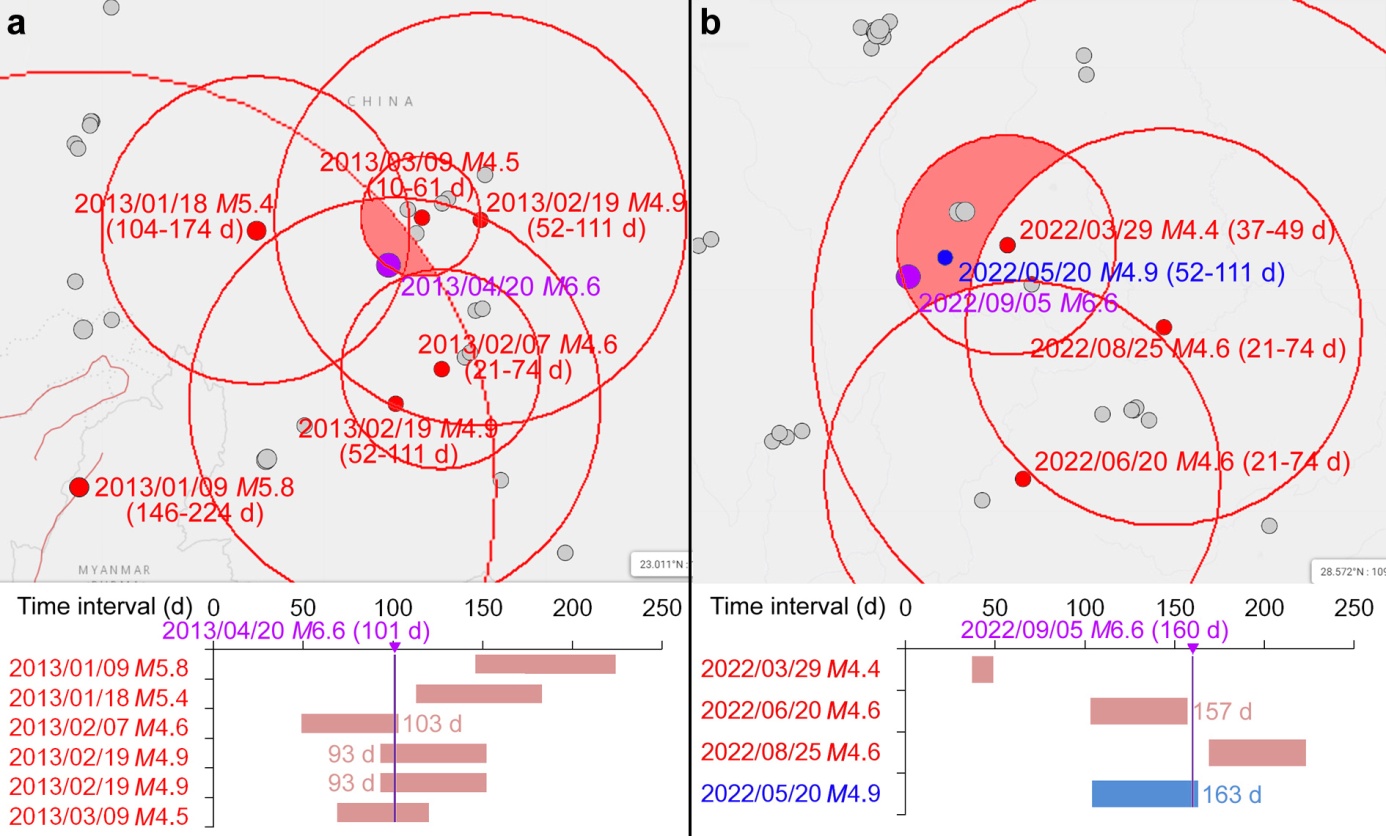


**Extended Data Figure 1 |** **Prediction and verification of the Lushan (China) *M*6.6 earthquake on Apr. 20, 2013 (a) and the Luding (China) *M*6.6 earthquake on Sep. 5, 2022 (b).** The adjacent precursor earthquakes (APEs) within a radius of 200 km are marked in blue; the triggering earthquakes (TGEs) outside a radius of 200 km are marked in red; and corresponding triggered earthquakes (TDEs) are marked in purple. The predicted dangerous belts are marked by the red cycles with radii calculated from the regression equations. The overlapping regions are marked in pink. The time frames for each TGE and APE are denoted by the light-red and light-blue squares, respectively. The purple triangle indicates the occurrence time of the TDE.
